# Supplementary material for: Cytochrome B5 type A alleviates HCC metastasis via regulating STOML2 related autophagy and promoting sensitivity to ruxolitinib
Source: PubMed Central journal article supplement (PMC9293983; doi:10.1038/s41419-022-05053-8), 2022-07-18

# S Figure 1-1

**A**

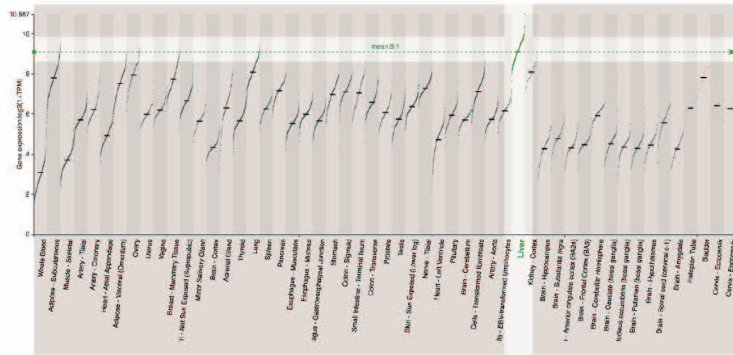

**B**

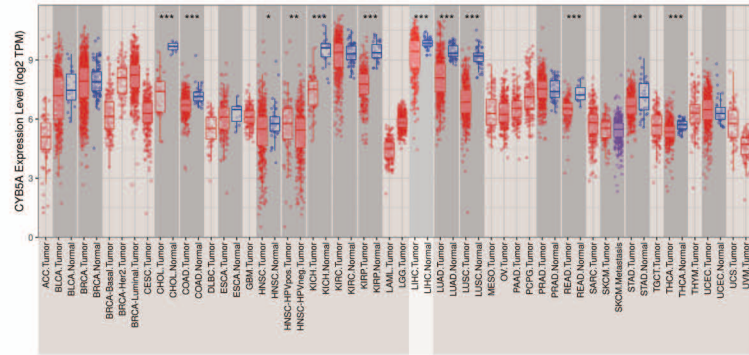

**C**

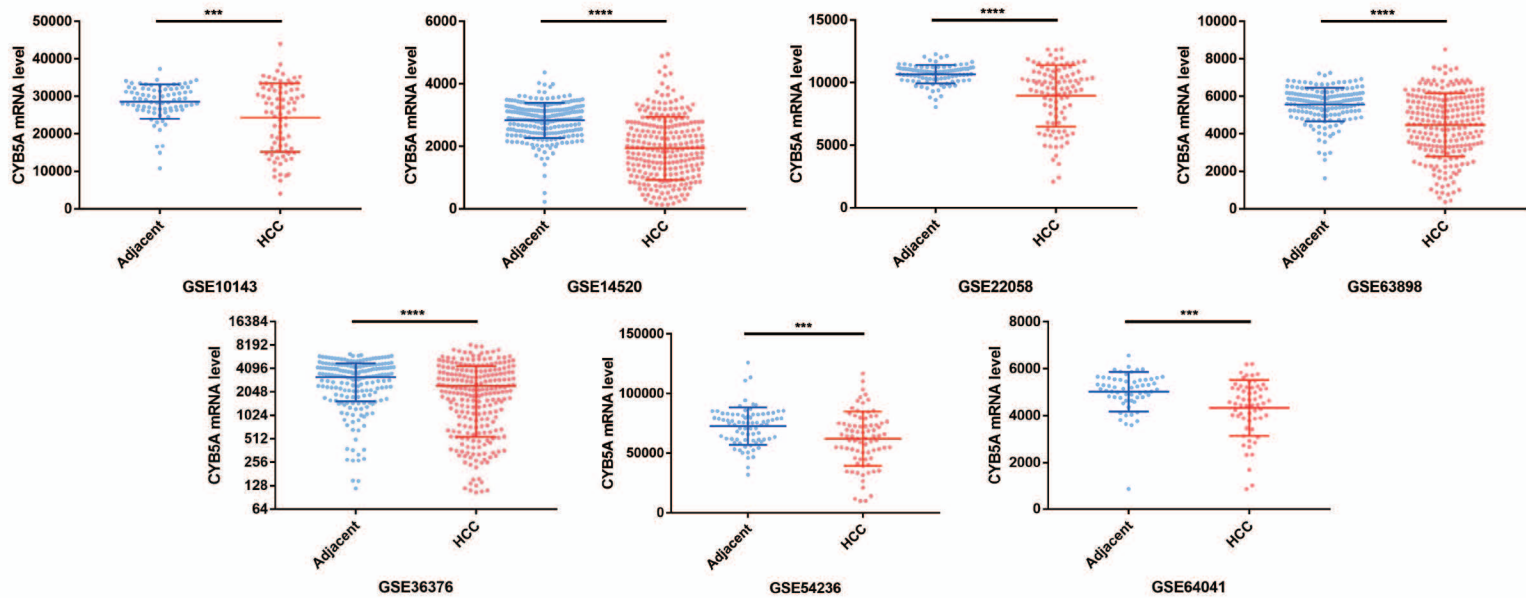

**D**

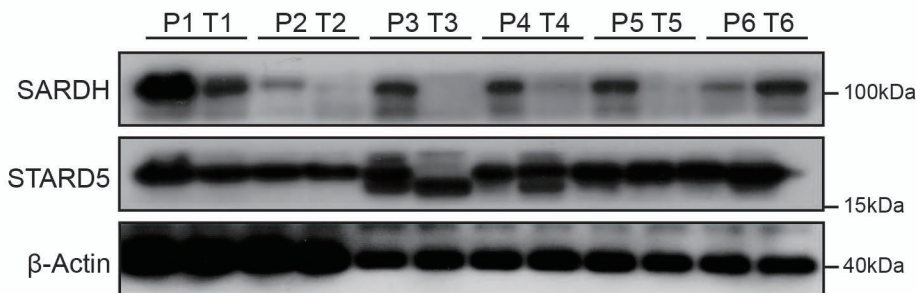

# S Figure 1-2

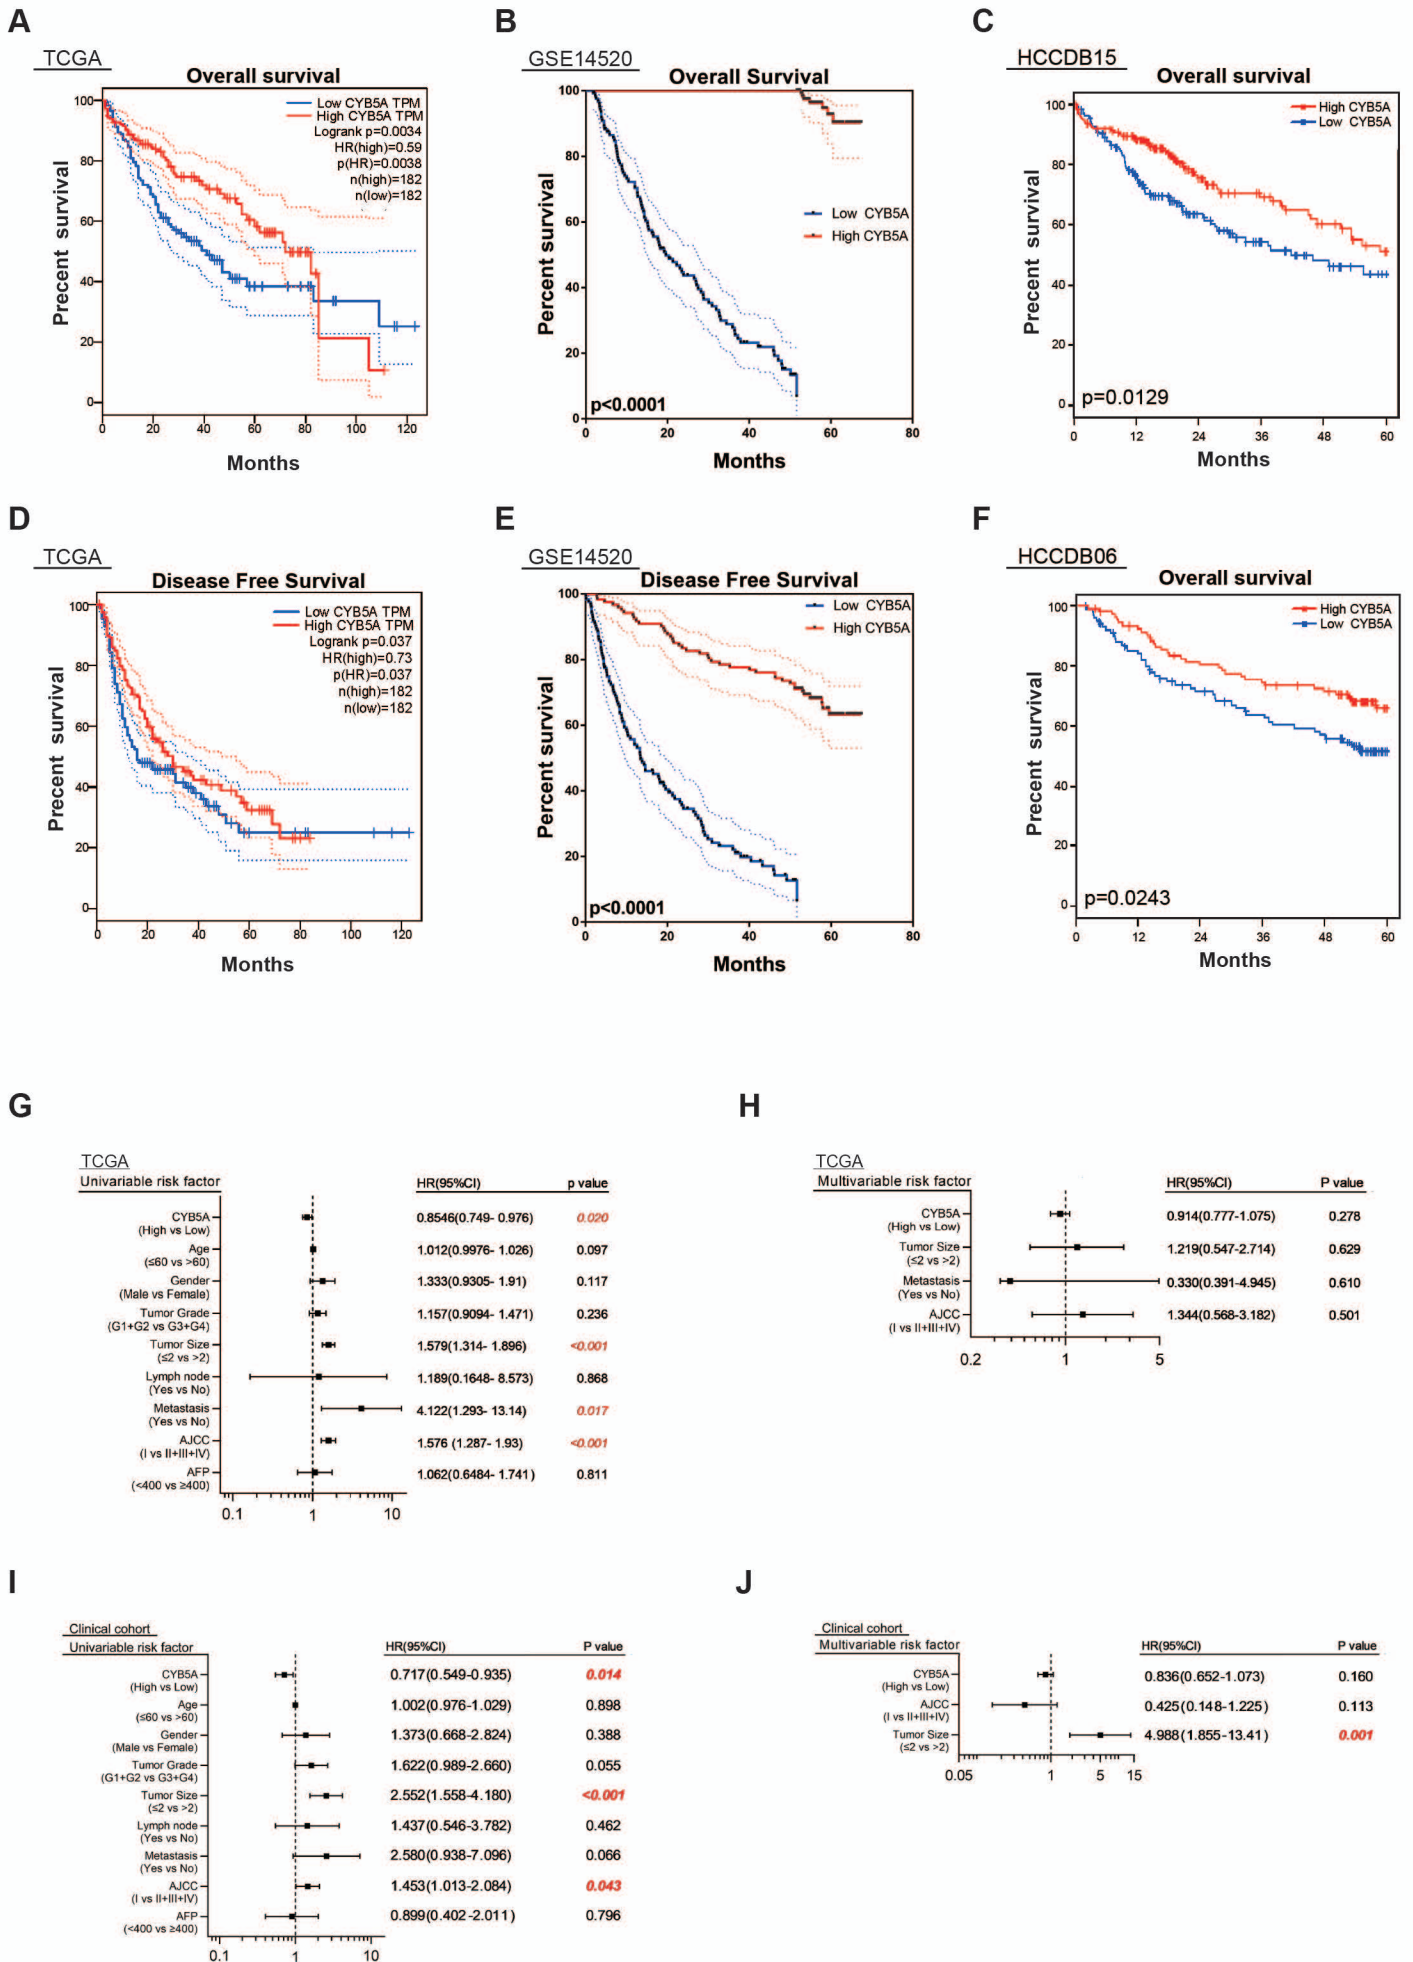

S Figure 2-1

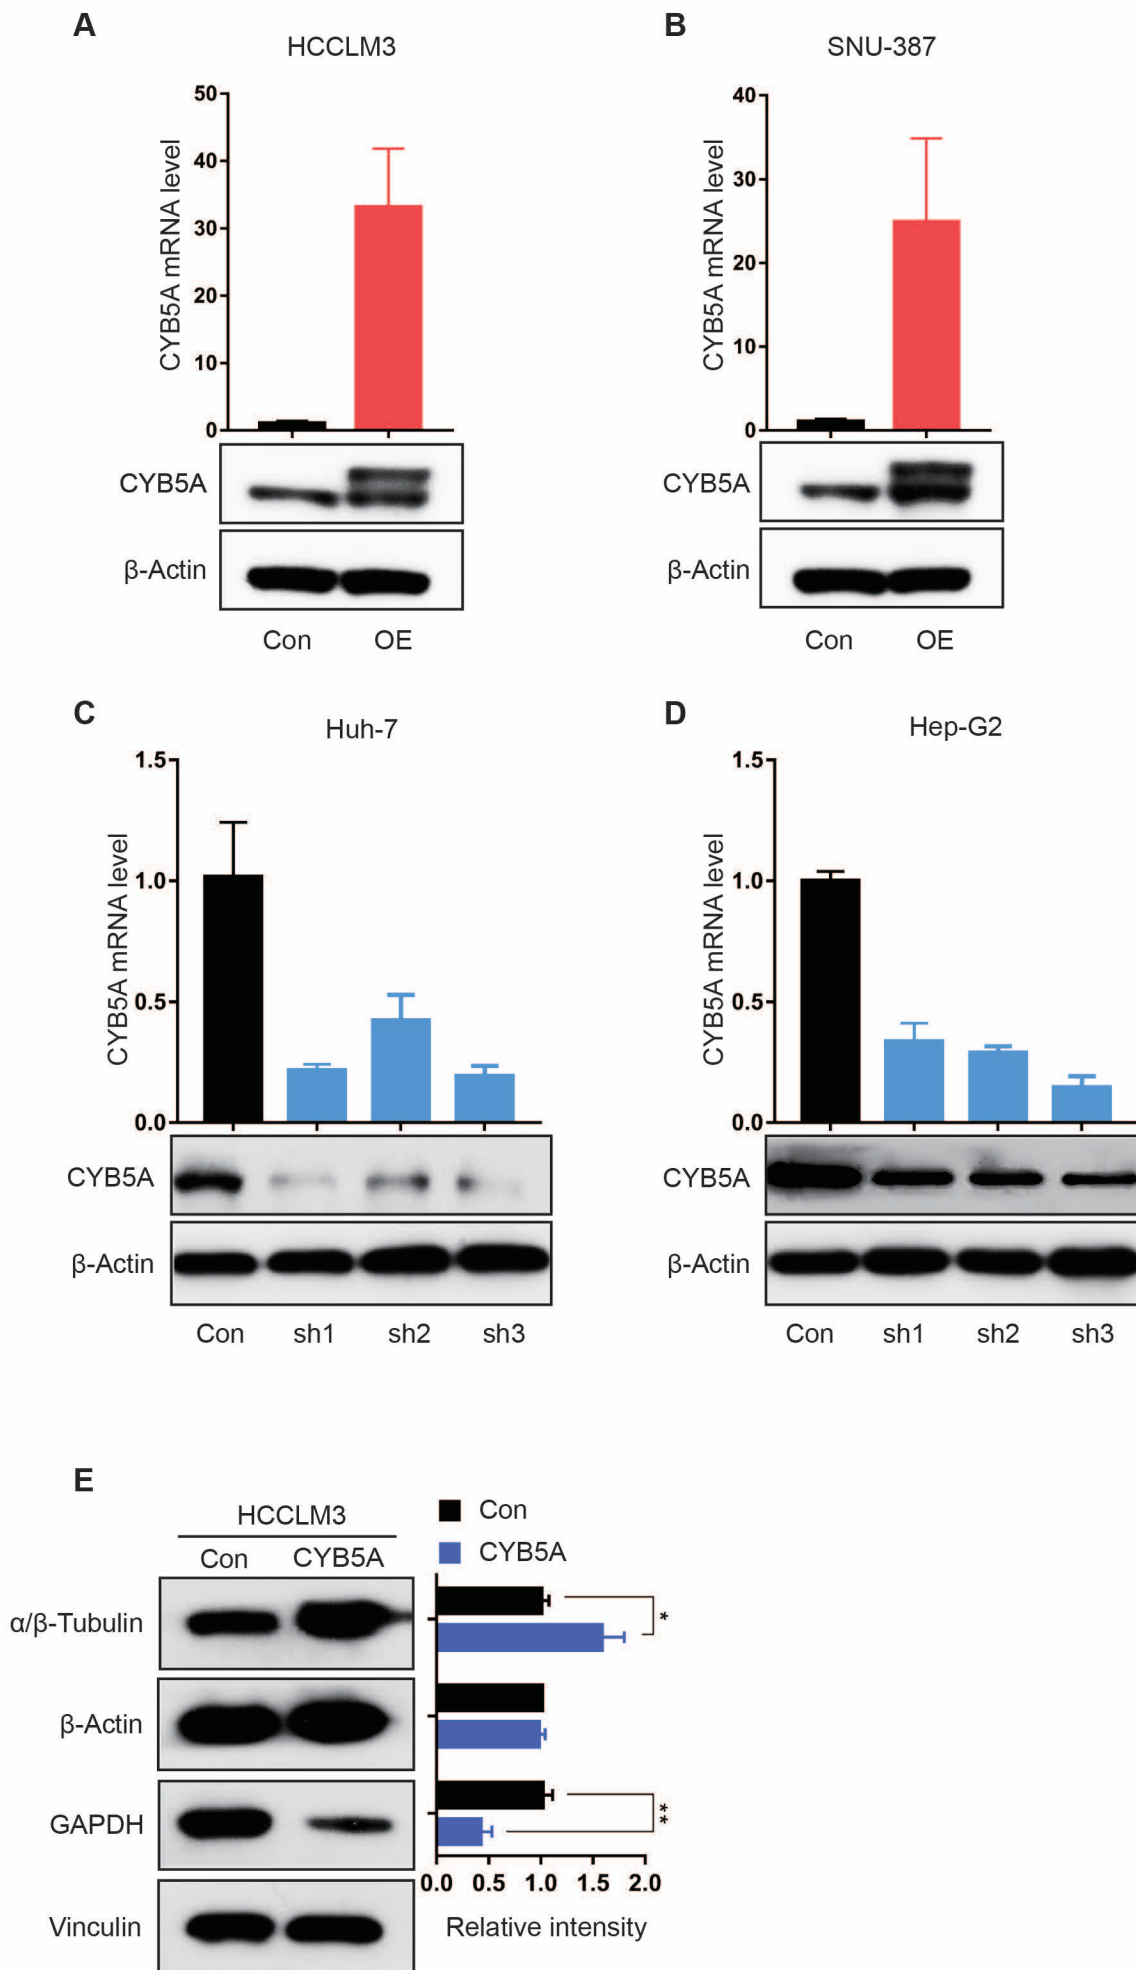



**S Figure 2-2**

**A**

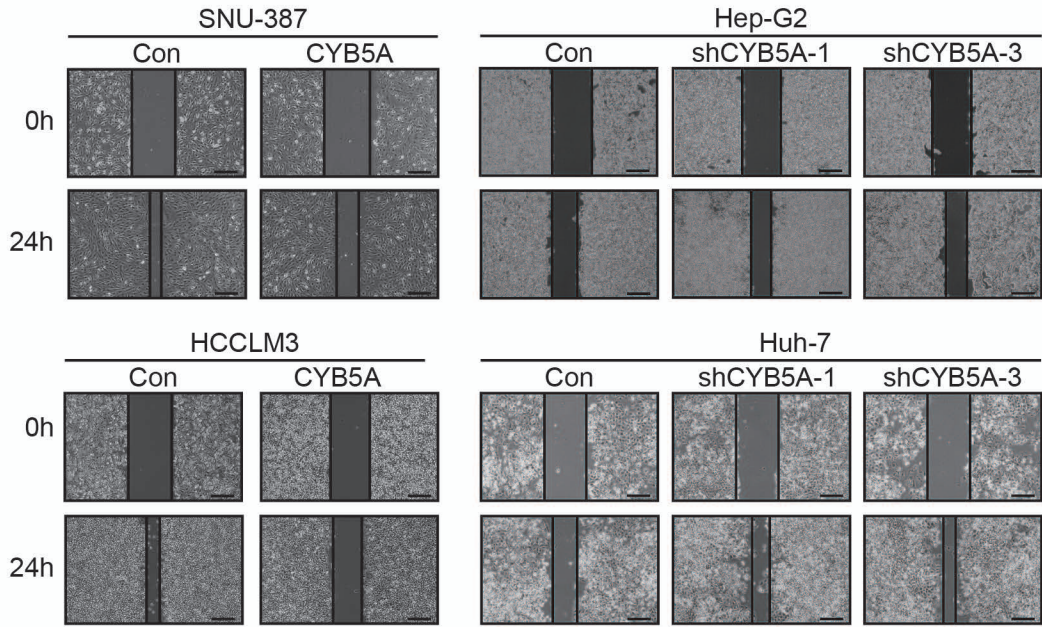

**B**

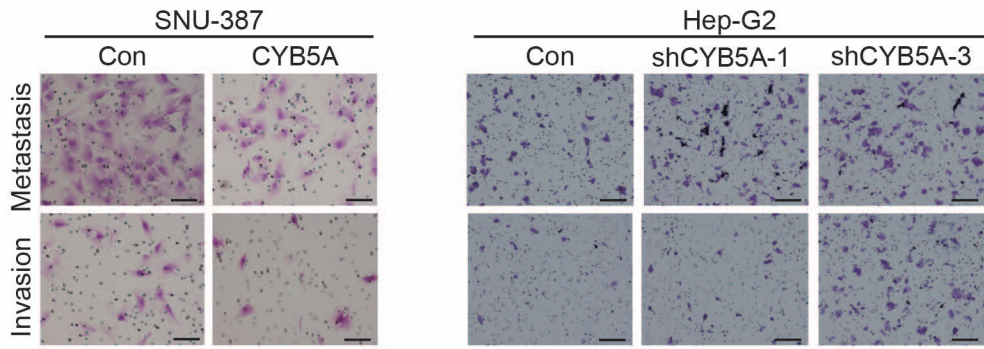

**C**

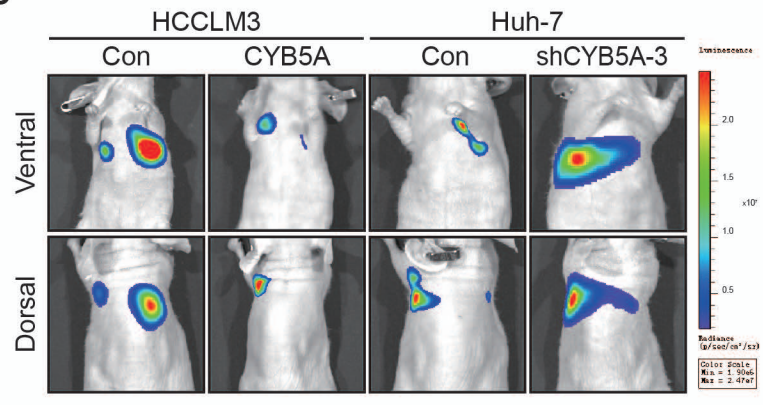

**D**

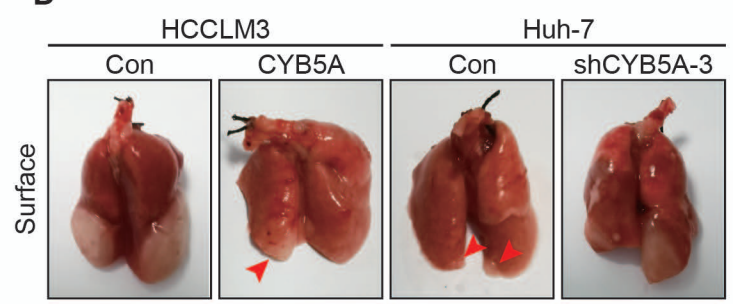

**E**

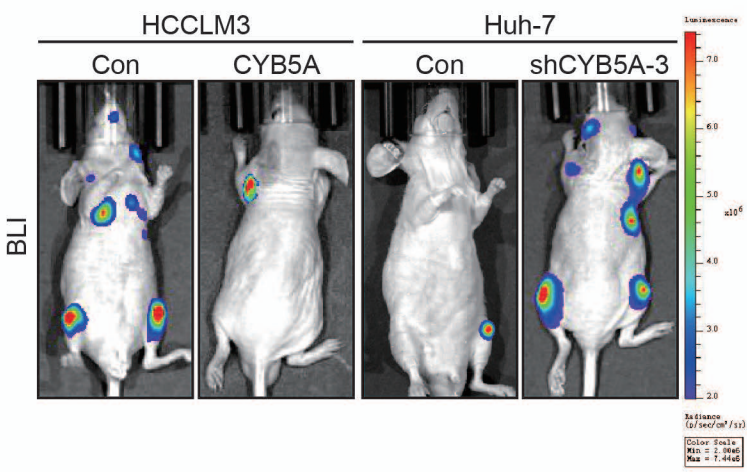



# S Figure 2-3

**A**

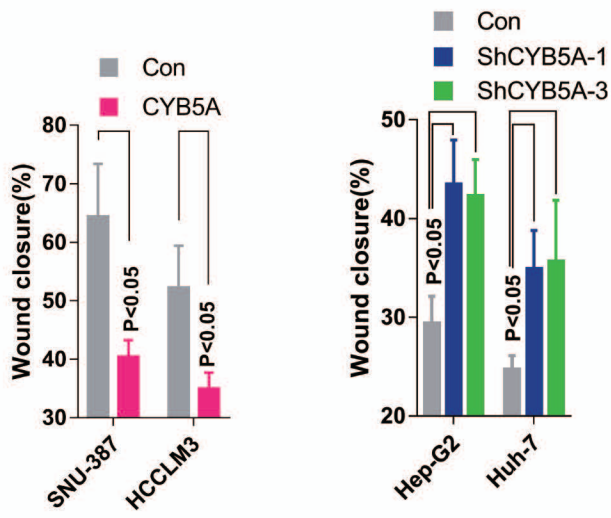

**B**

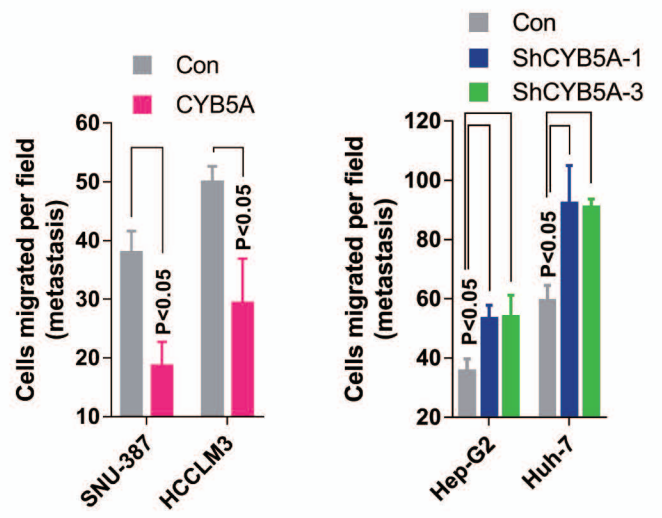

**C**

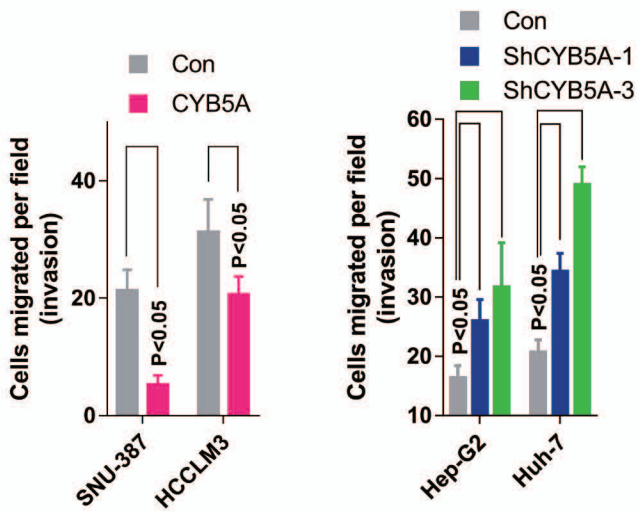

**D**

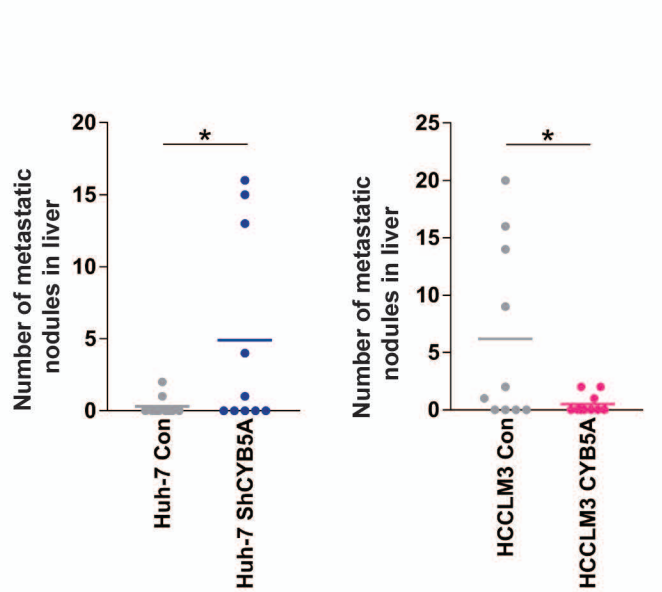

**E**

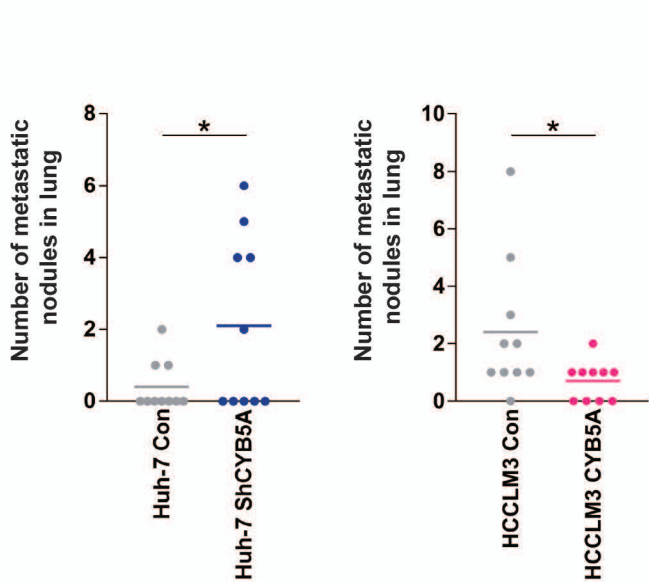

**F**

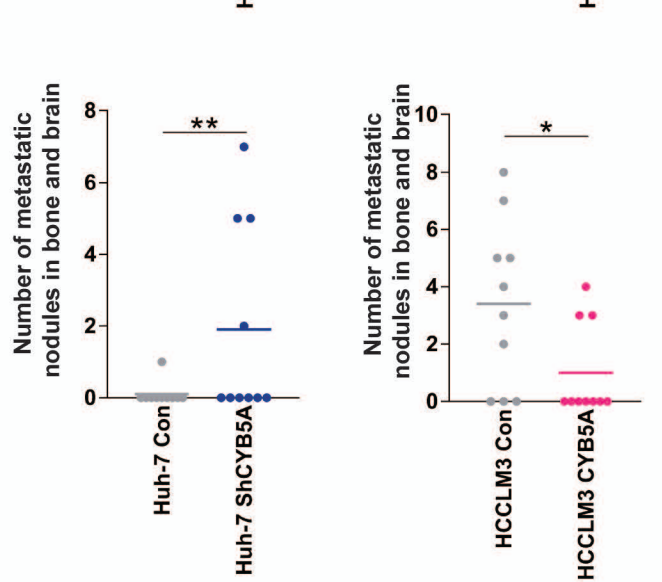

**G**

| Incidence of liver metastasis |                  | Incidence of lung metastasis |                 | Incidence of bone&brain metastasis |                       |
|-------------------------------|------------------|------------------------------|-----------------|------------------------------------|-----------------------|
|                               | Liver metastasis |                              | Lung metastasis |                                    | Bone&brain metastasis |
| Huh-7 Con                     | 2/10             | Huh-7 Con                    | 3/10            | Huh-7 Con                          | 1/10                  |
| Huh-7 ShCYB5A                 | 5/10             | Huh-7 ShCYB5A                | 5/10            | Huh-7 ShCYB5A                      | 4/10                  |
| HCCLM3 Con                    | 6/10             | HCCLM3 Con                   | 9/10            | HCCLM3 Con                         | 7/10                  |
| HCCLM3 CYB5A                  | 3/10             | HCCLM3 CYB5A                 | 6/10            | HCCLM3 CYB5A                       | 3/10                  |

# S Figure 2-4

## A

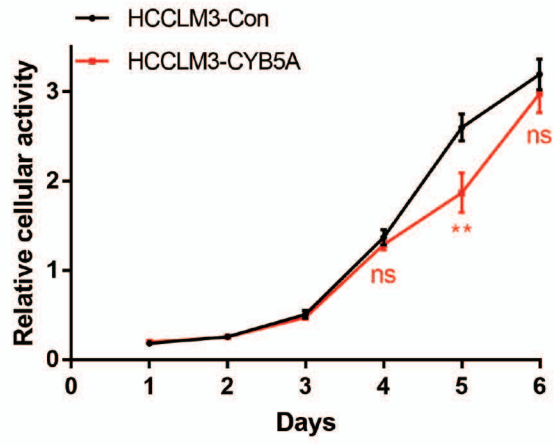

## B

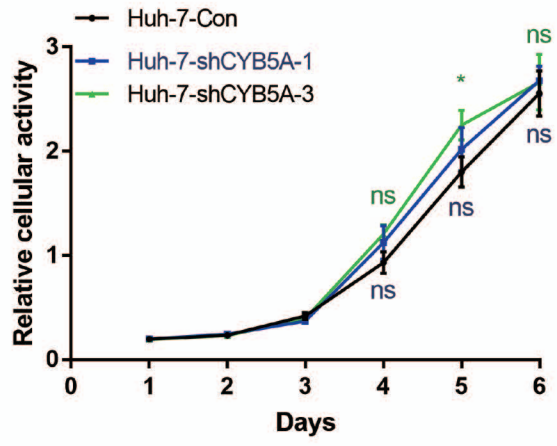

## C

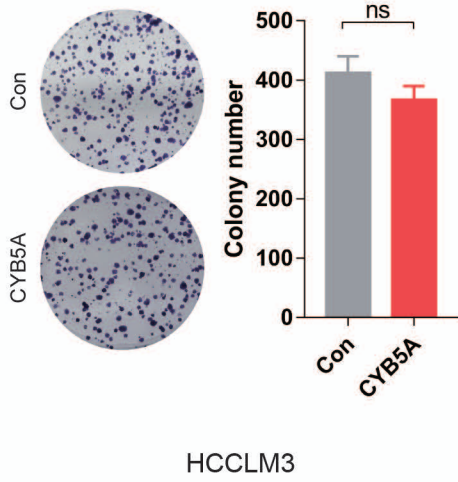

## D

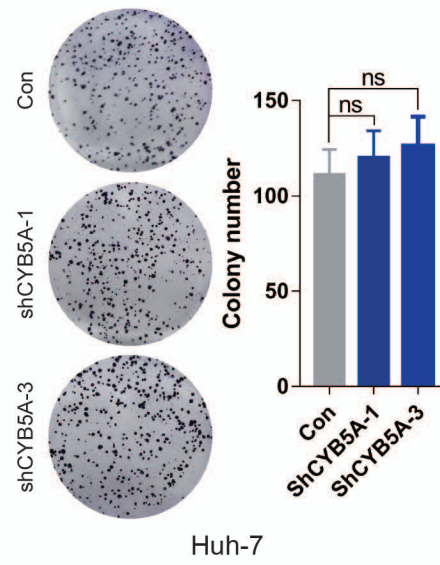

### S Figure 3-1

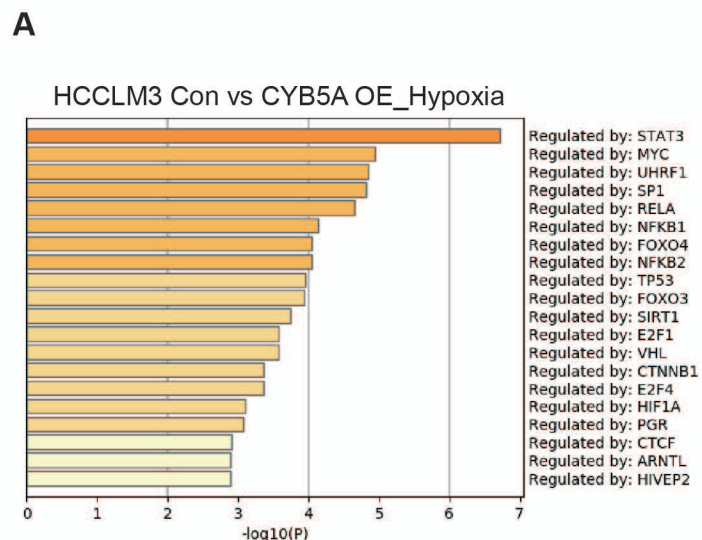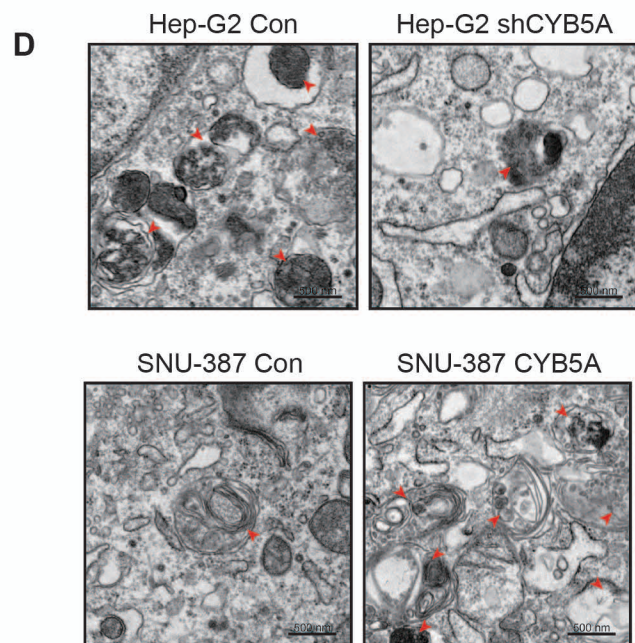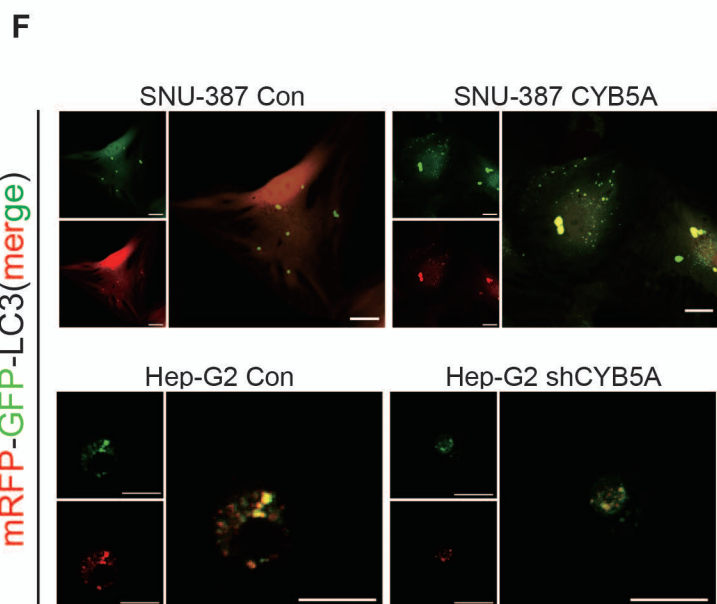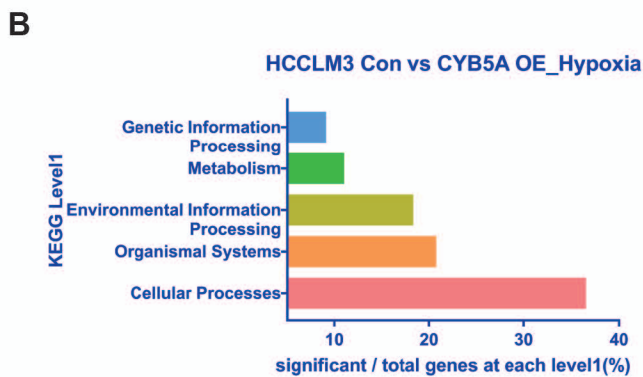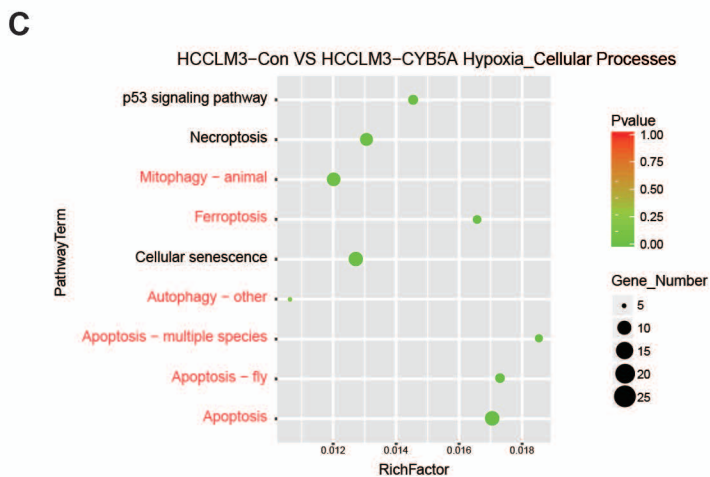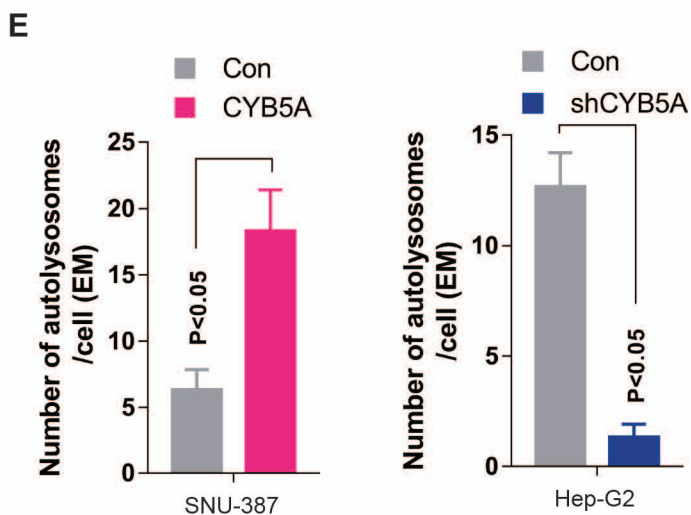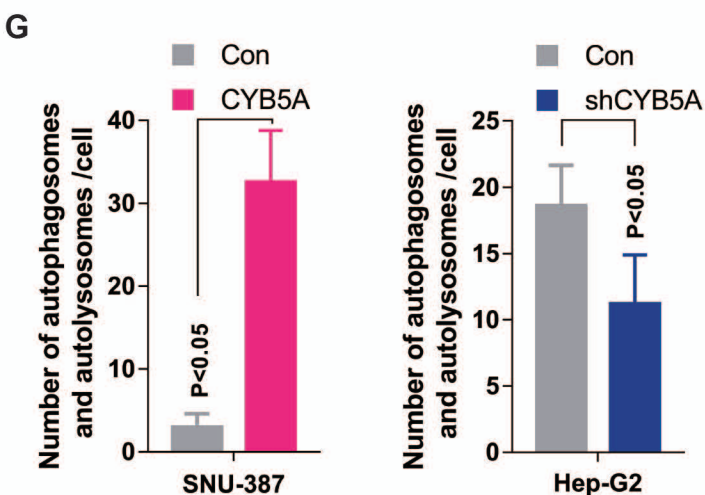



**S Figure 3-2**

**A**

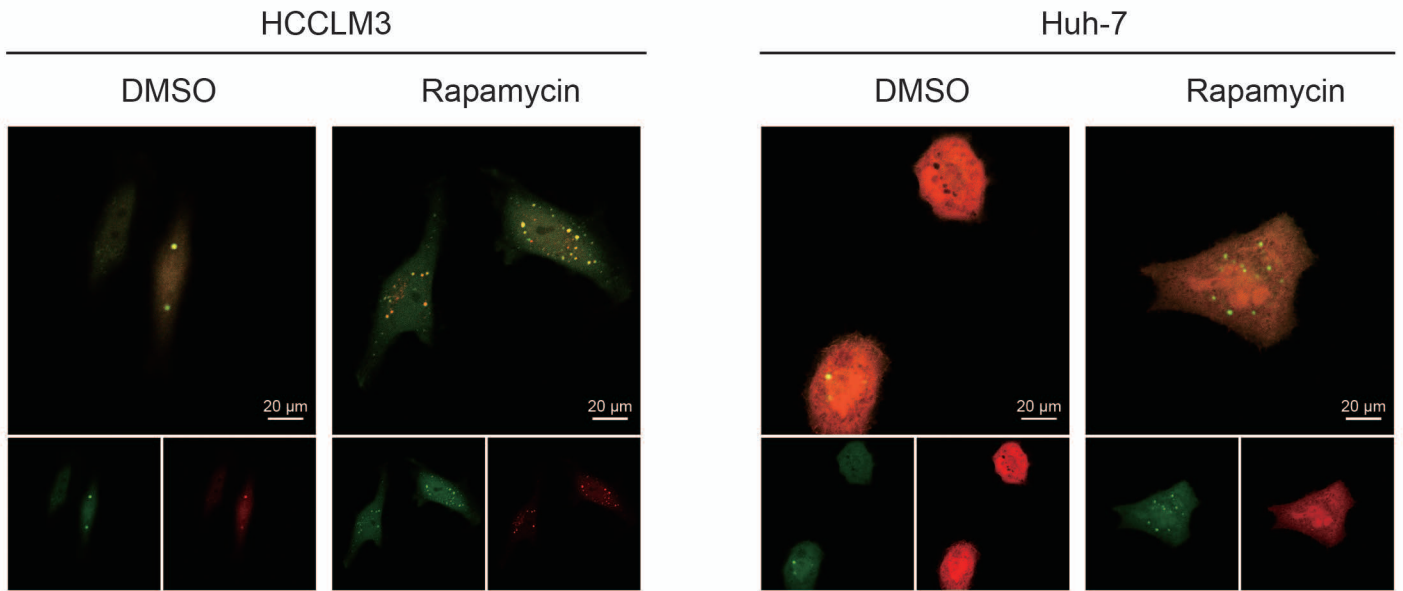

**B**

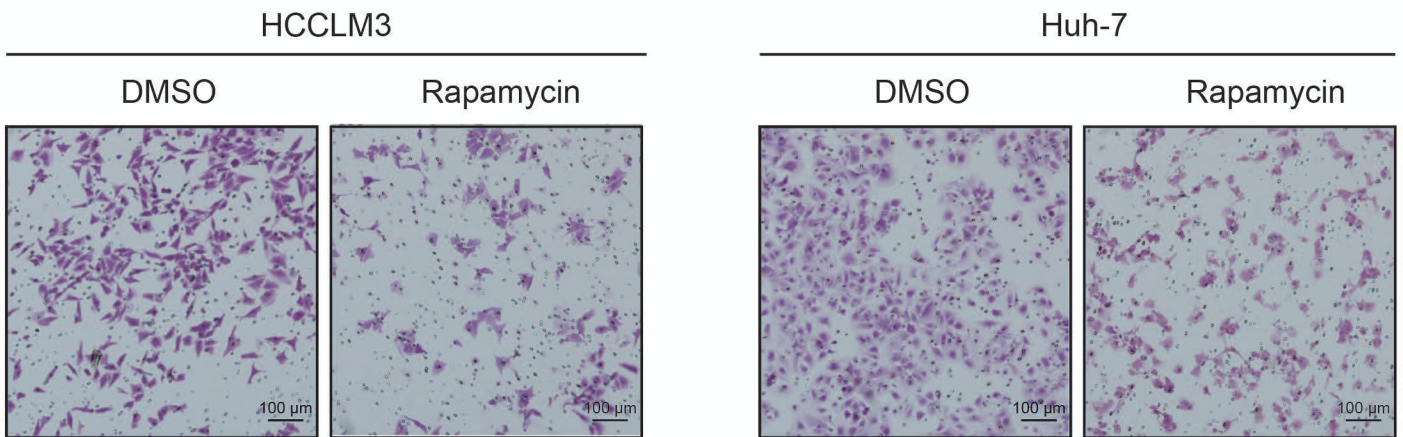

# S Figure 3-3

**A**

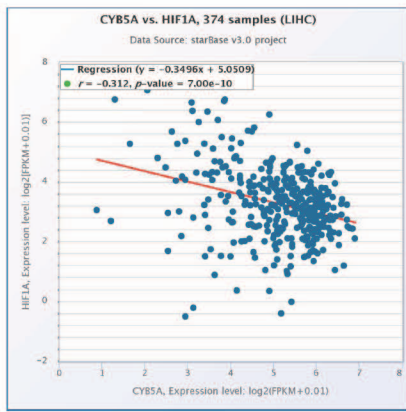

**B**

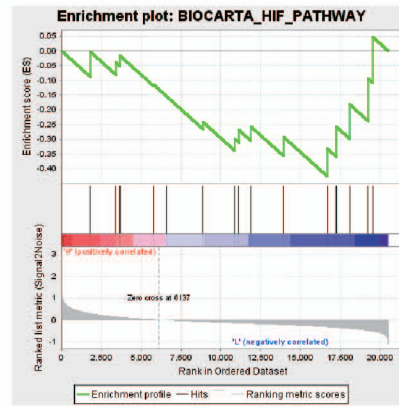

**C**

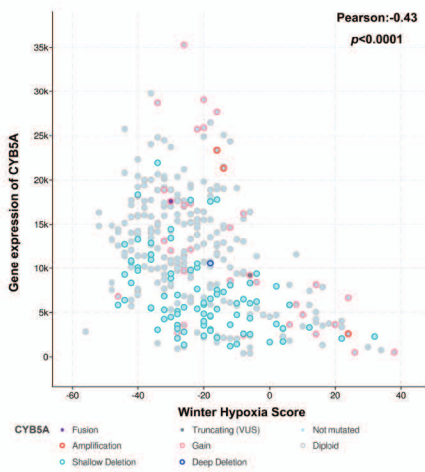

**D**

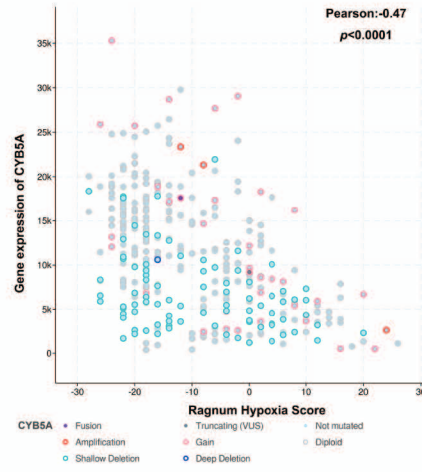

**E**

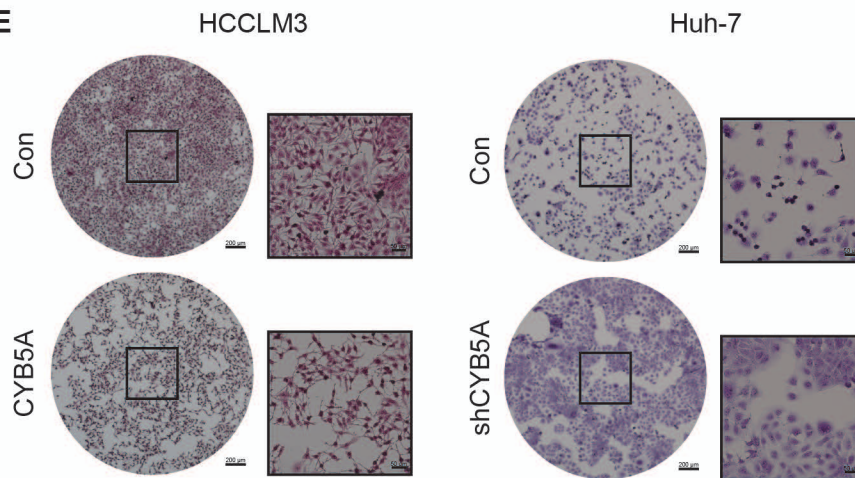

**F**

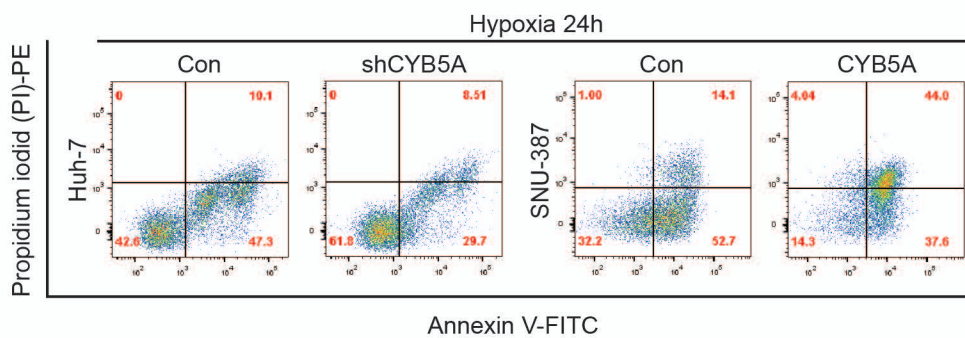

**G**

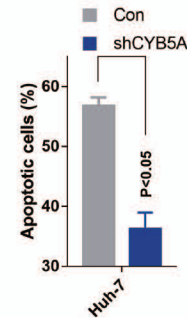

**H**

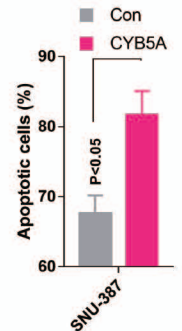

# S Figure 4-1

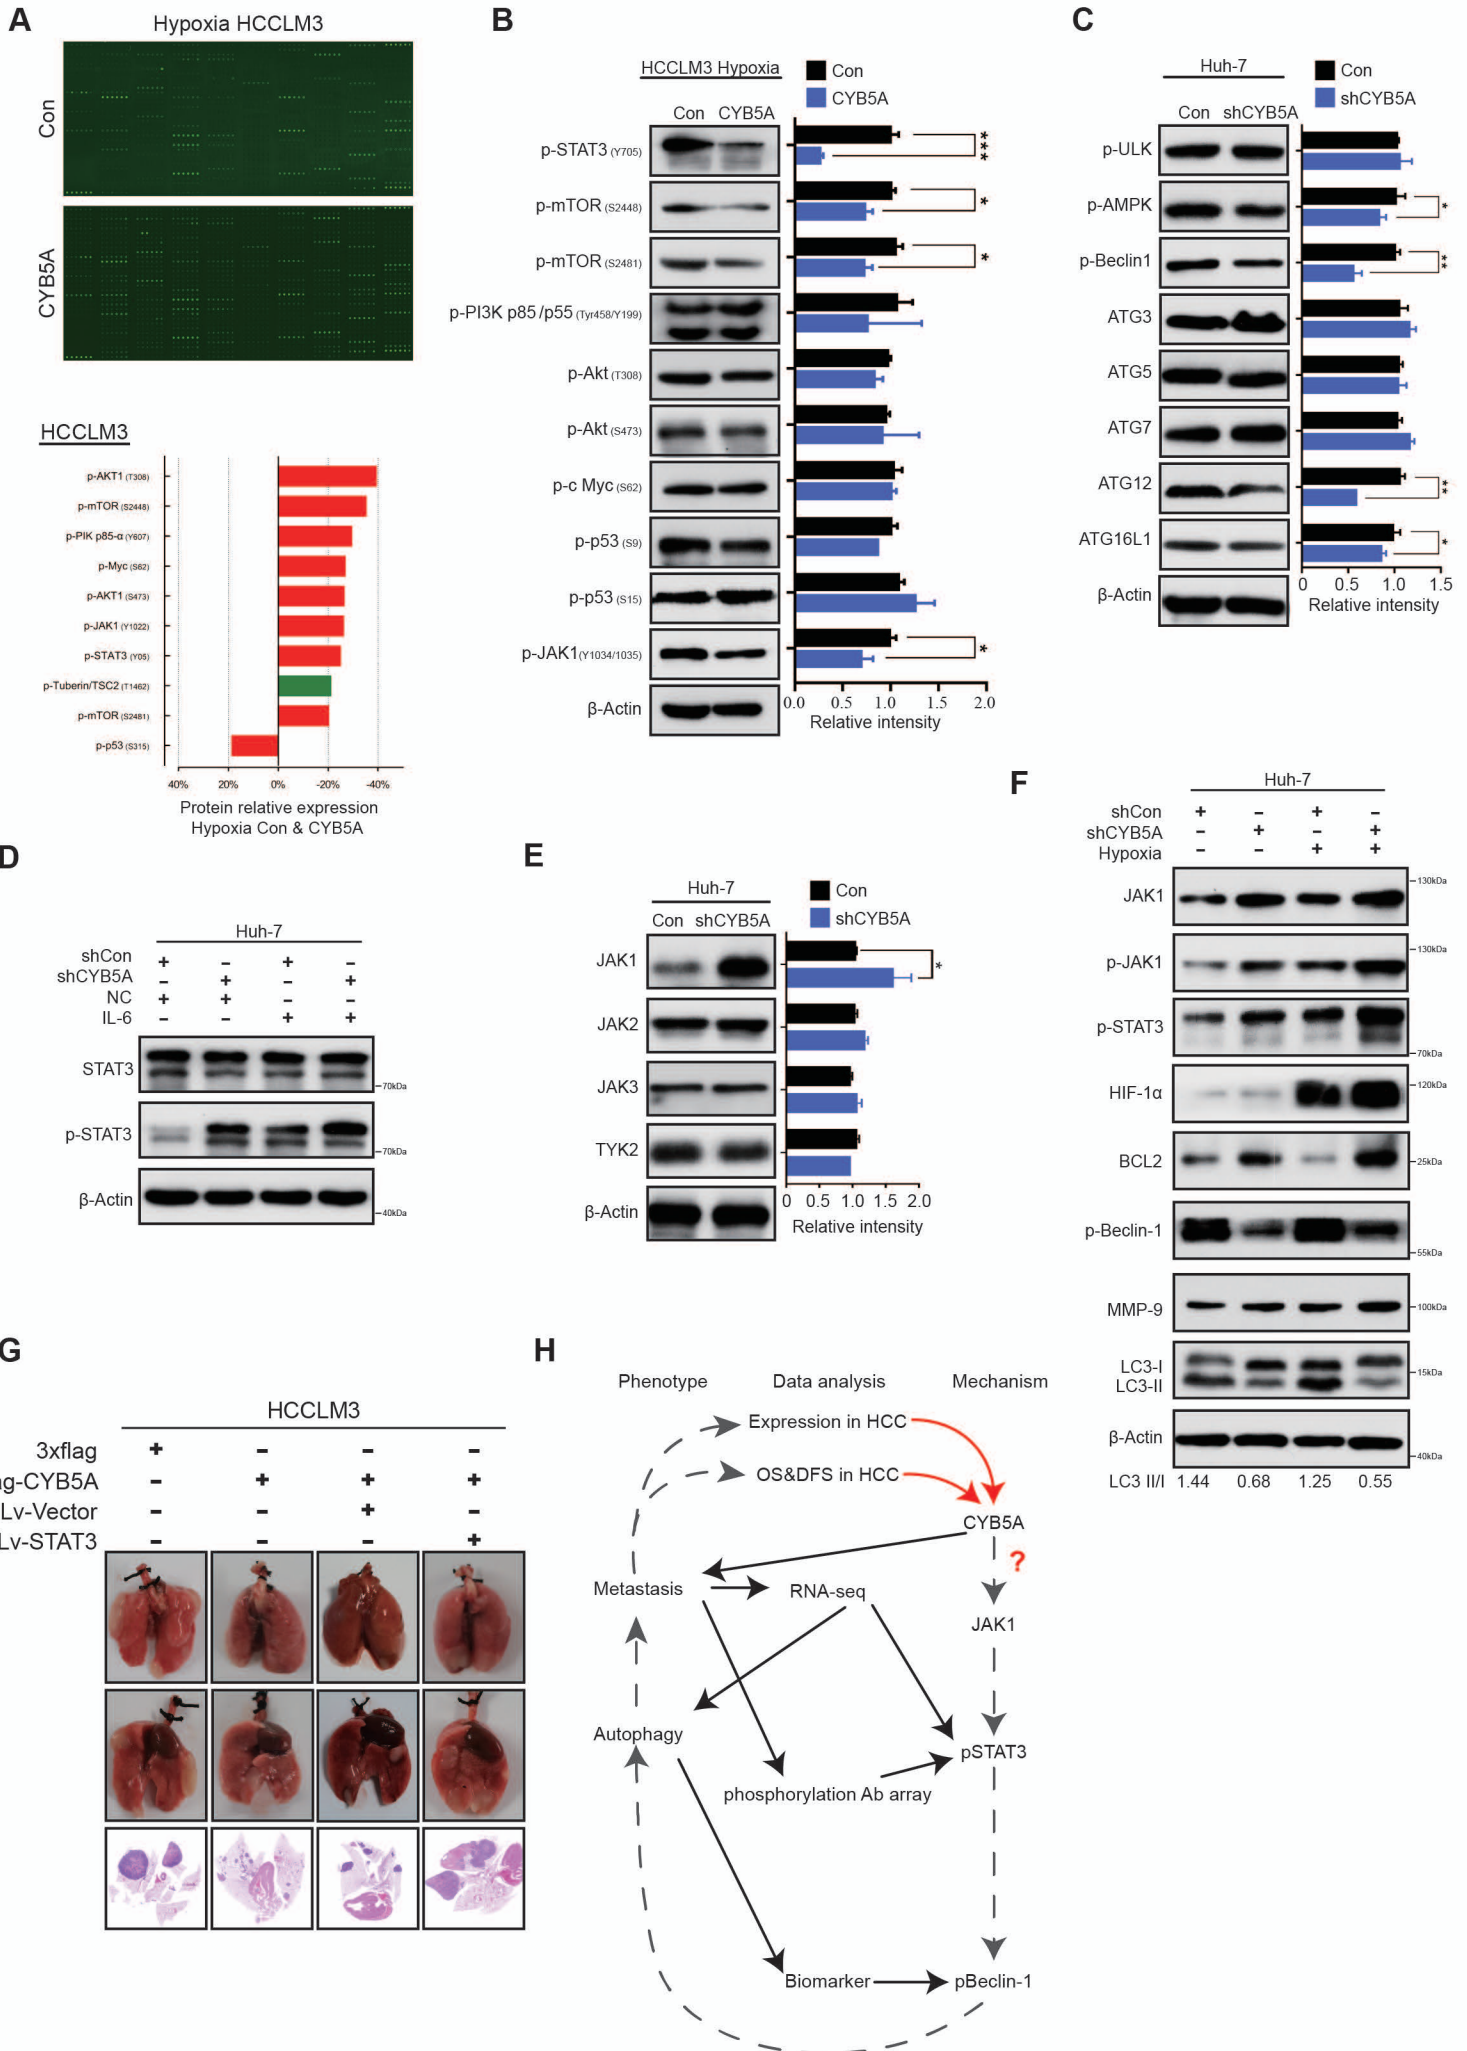



## S Figure 4-2

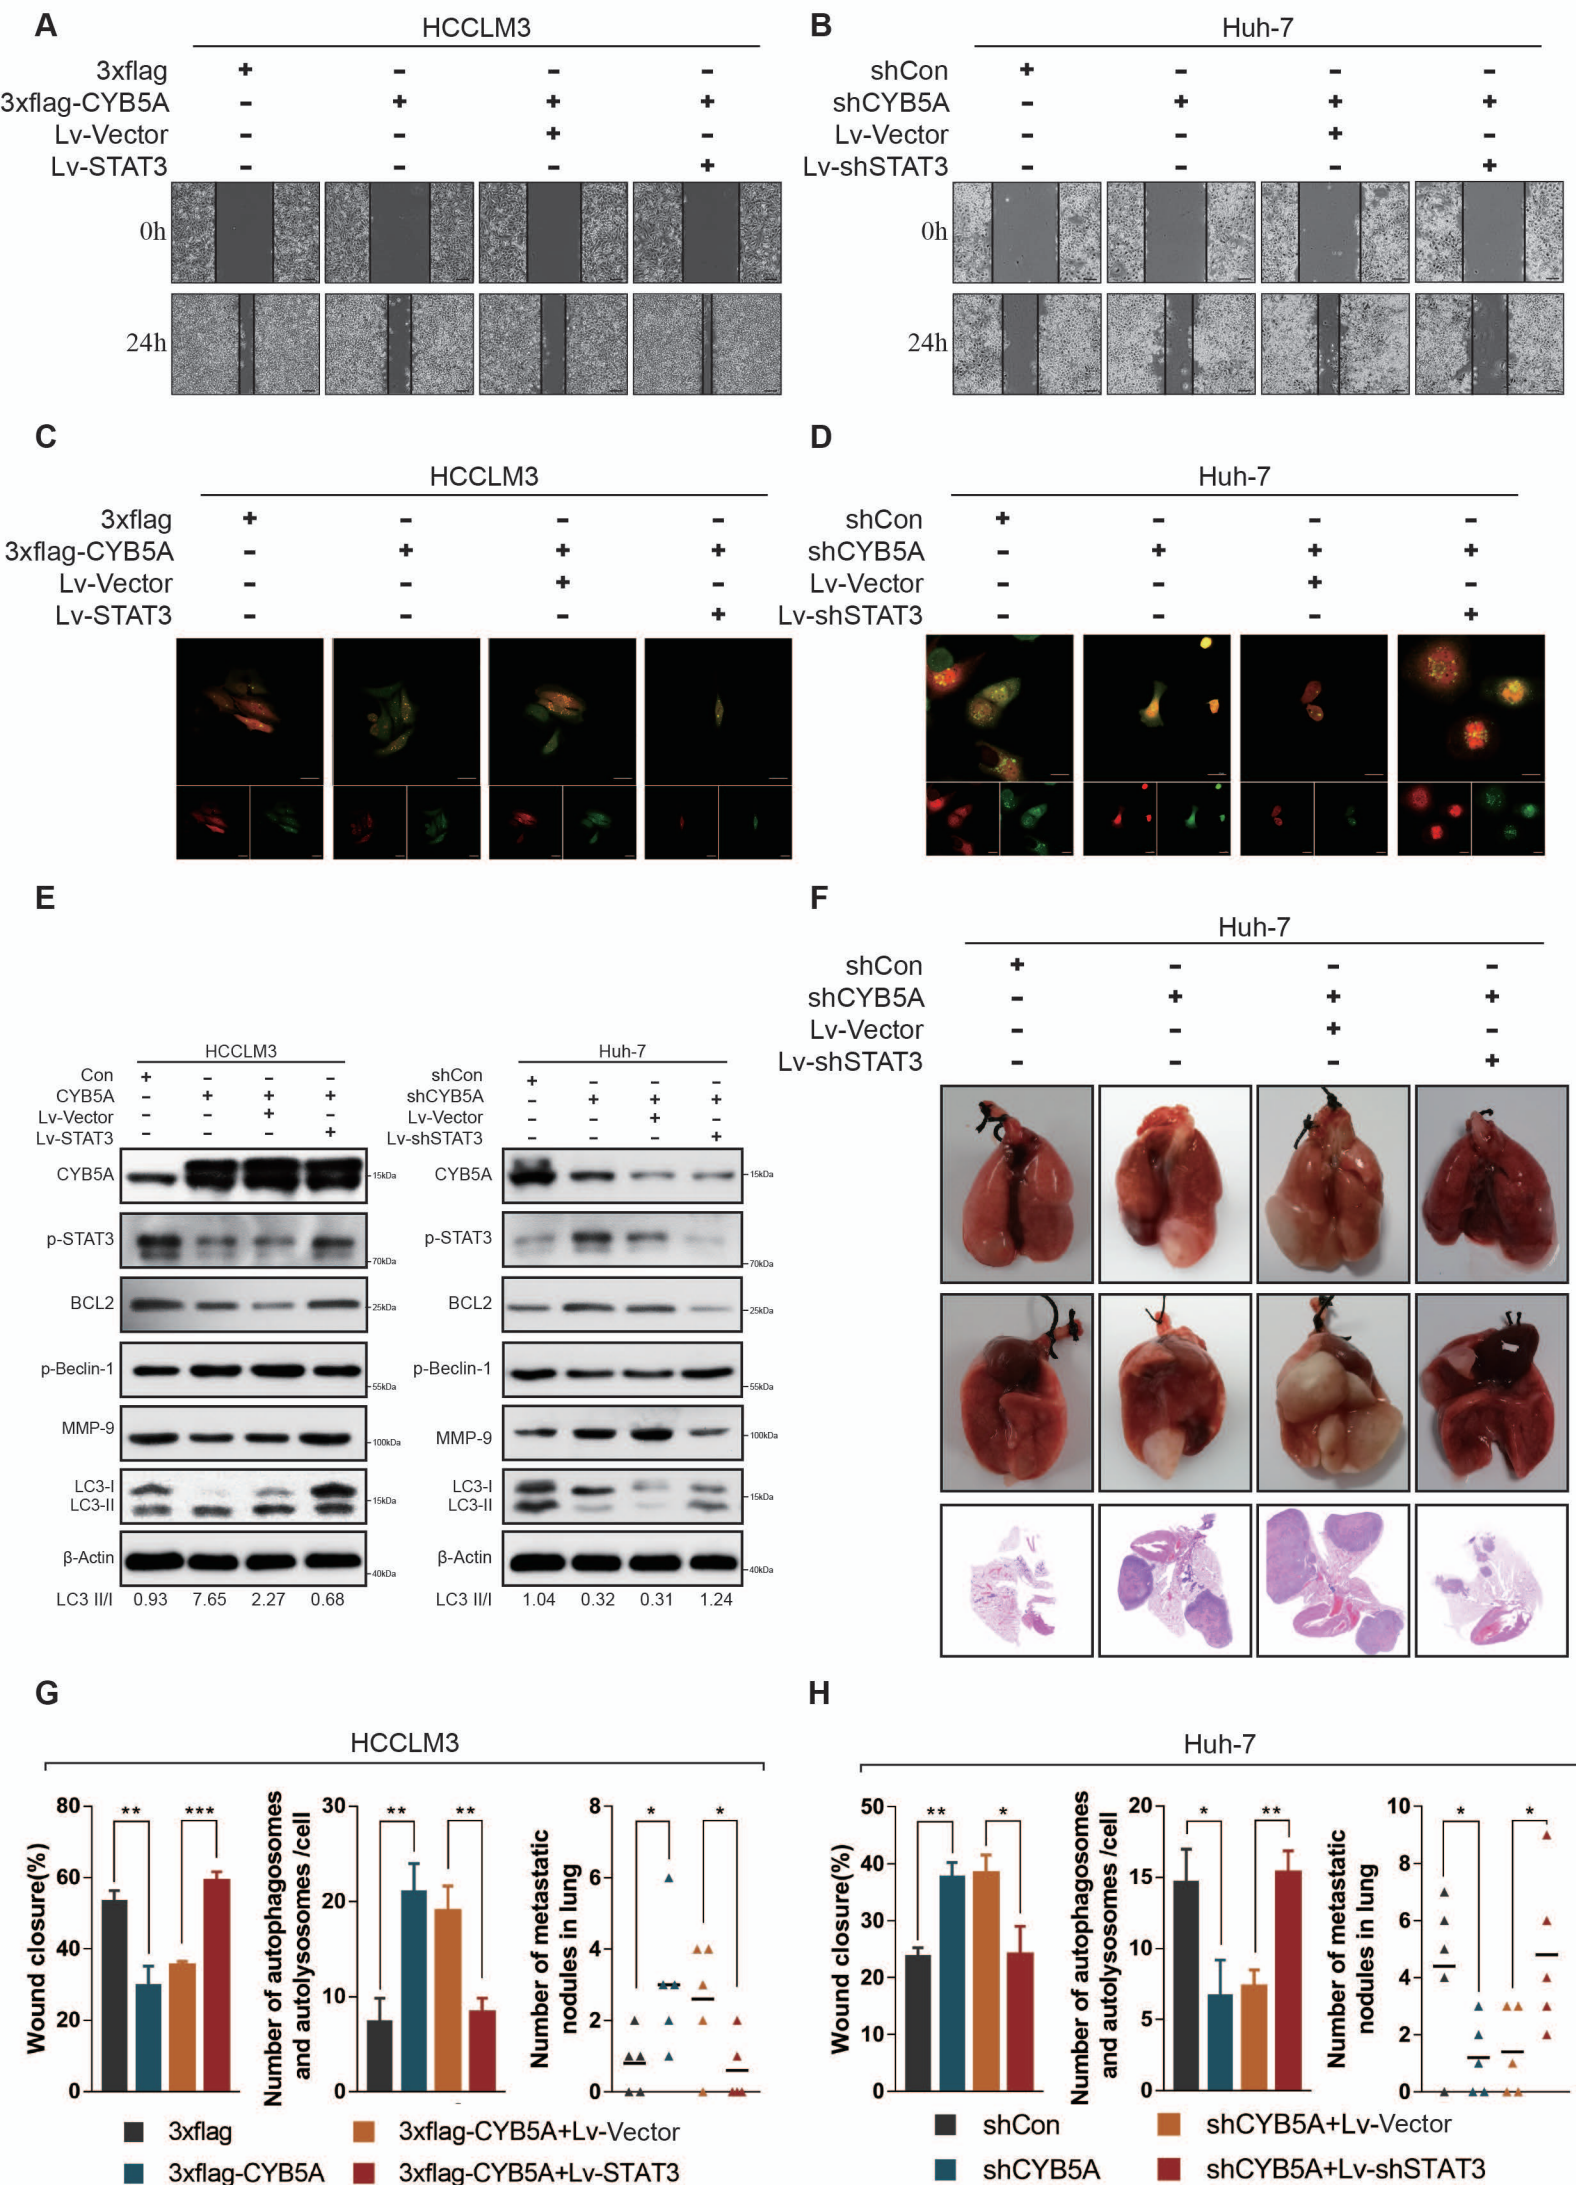

# S Figure 5-1

## A

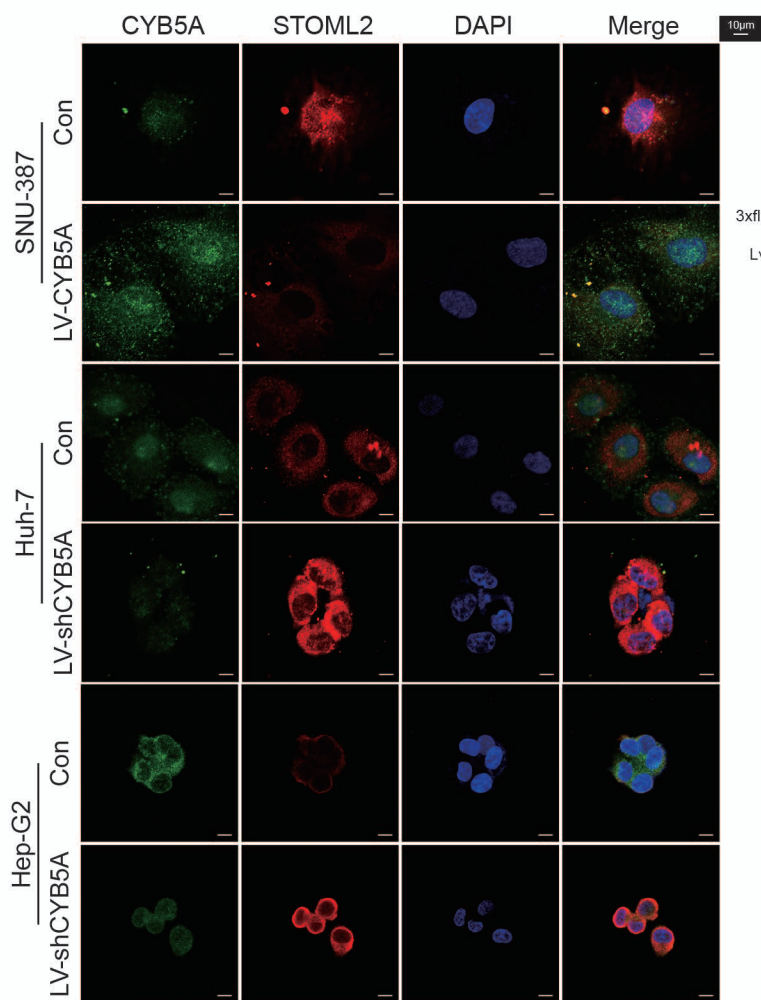

## B

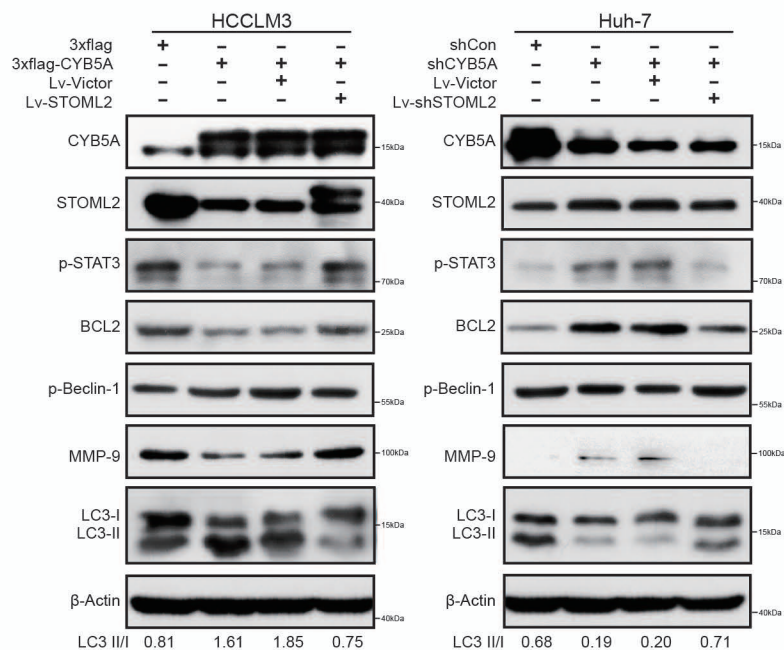

## C

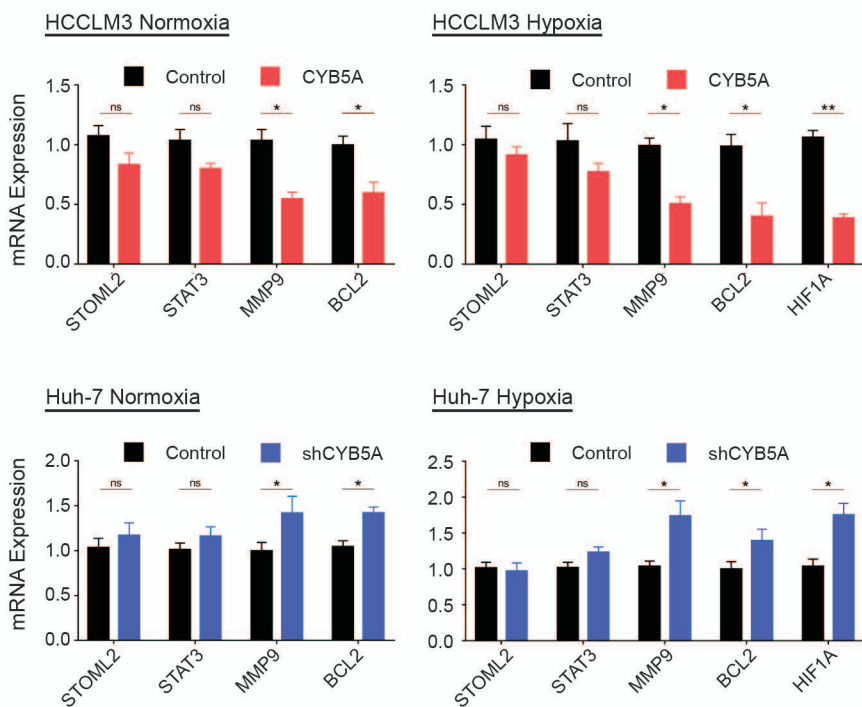

## D

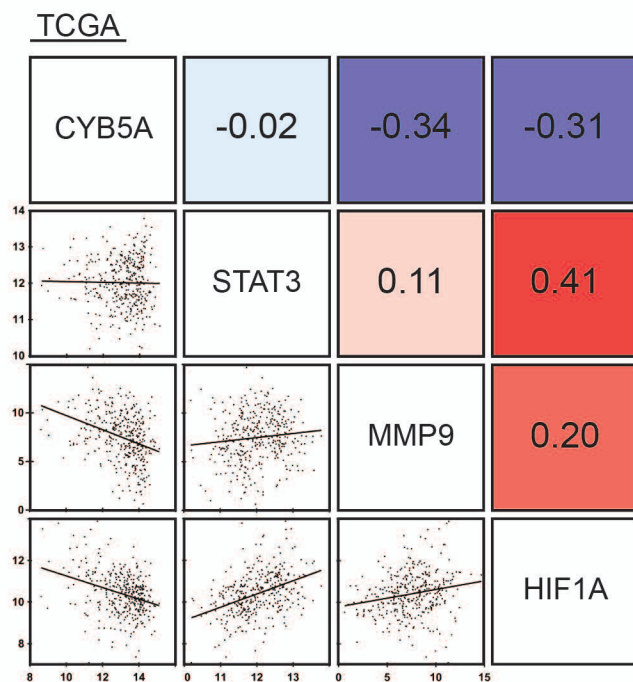



**S Figure 5-2**

**A**

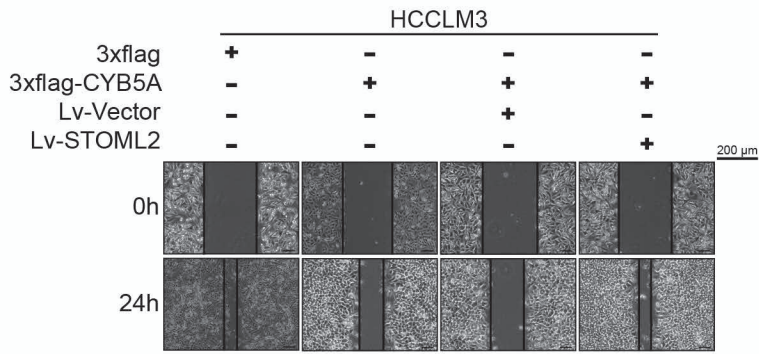

**B**

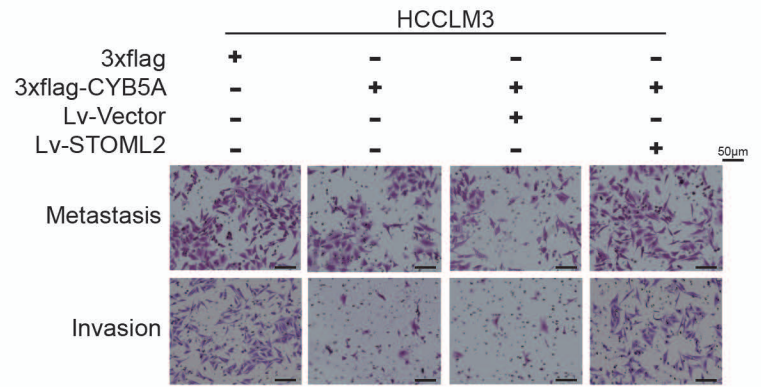

**C**

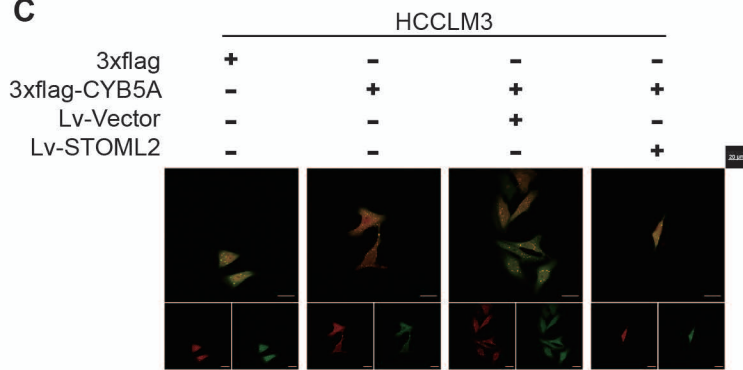

**D**

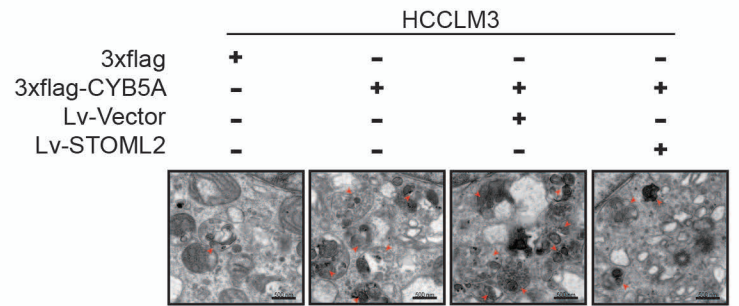

**E**

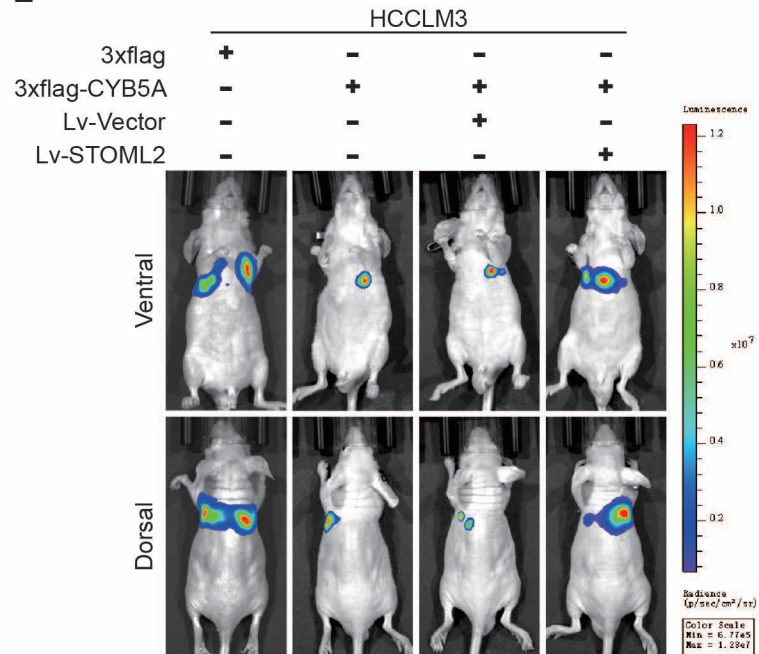

**F**

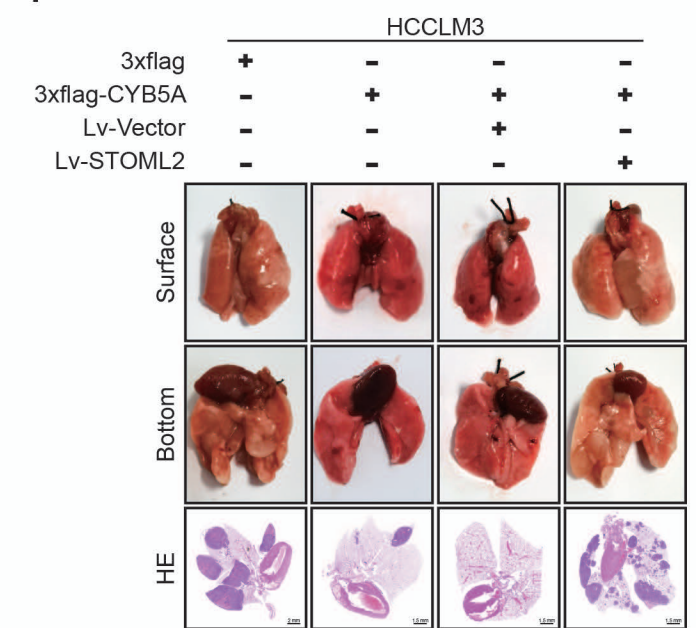

**G**

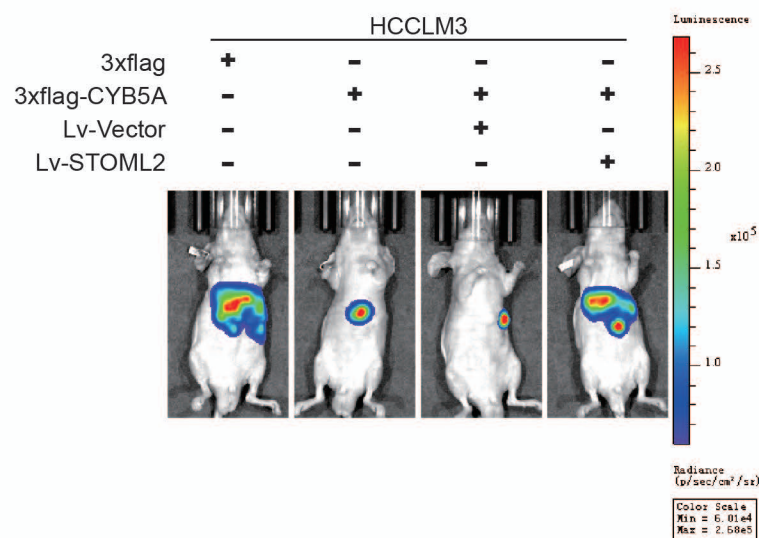

**H**

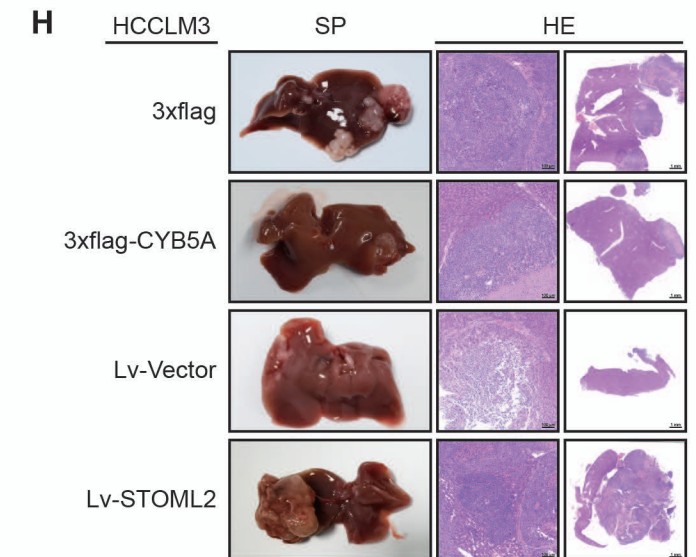



# S Figure 5-3

## A

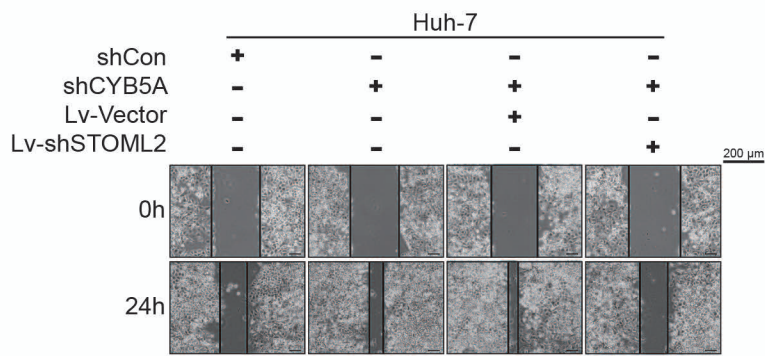

## B

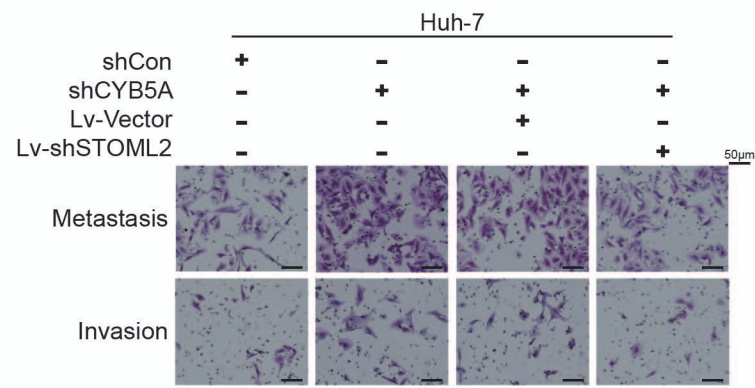

## C

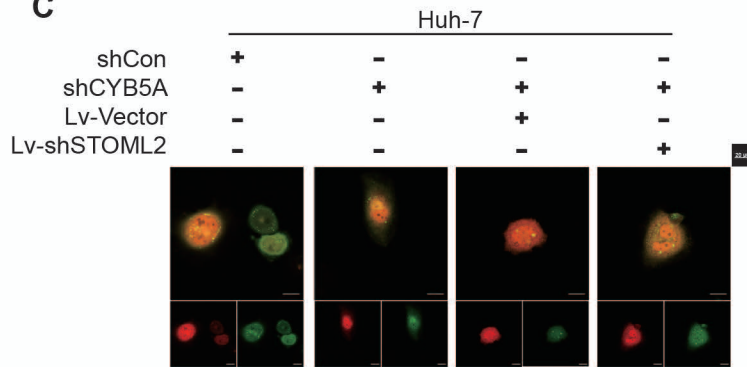

## D

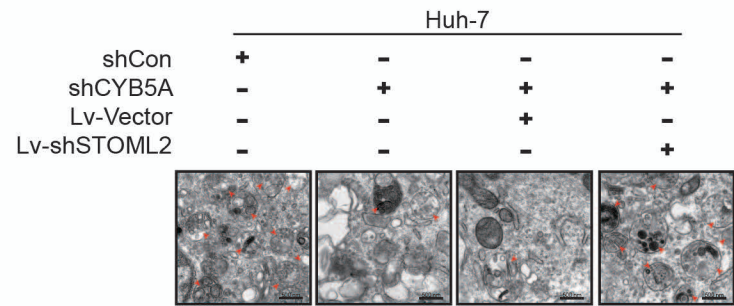

## E

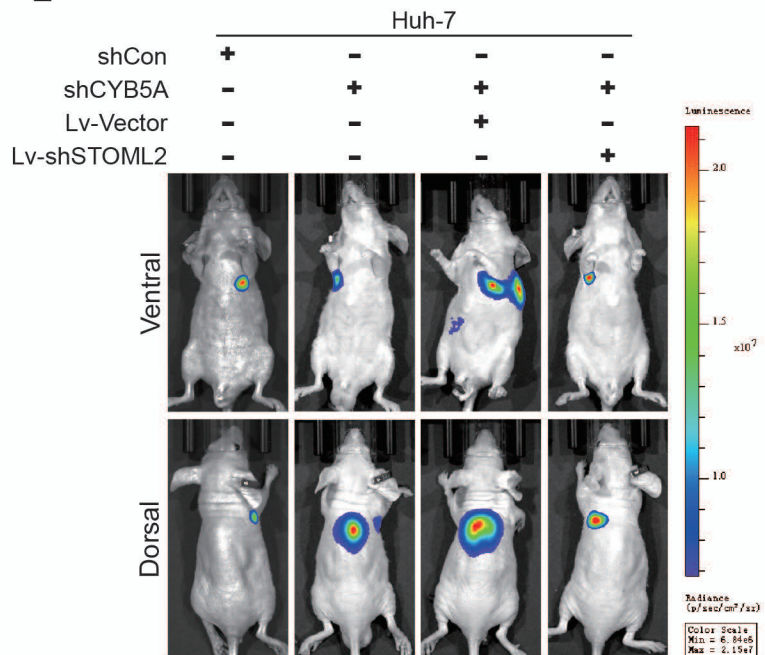

## F

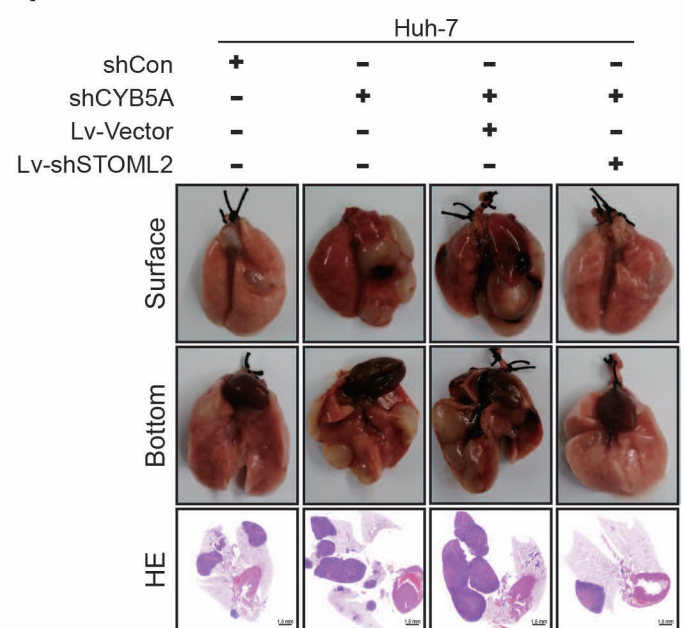

## G

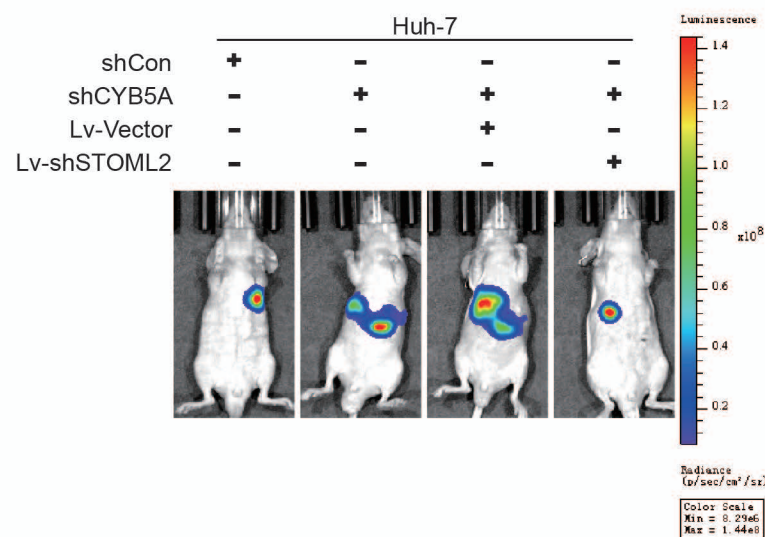

## H

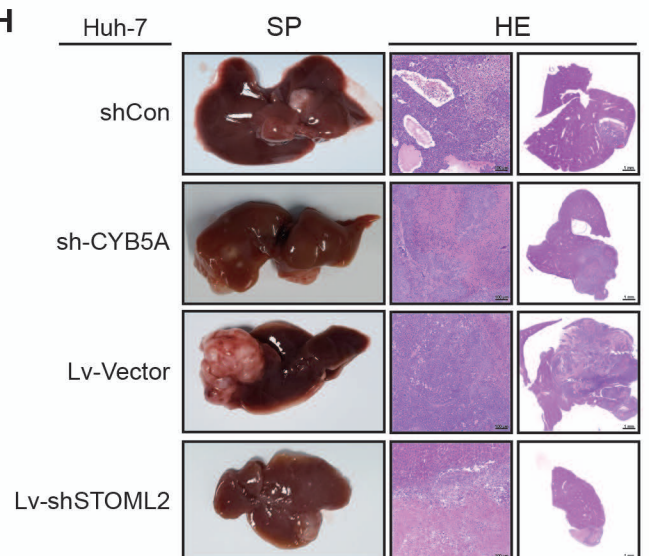

S Figure 5-4

A

HCCLM3

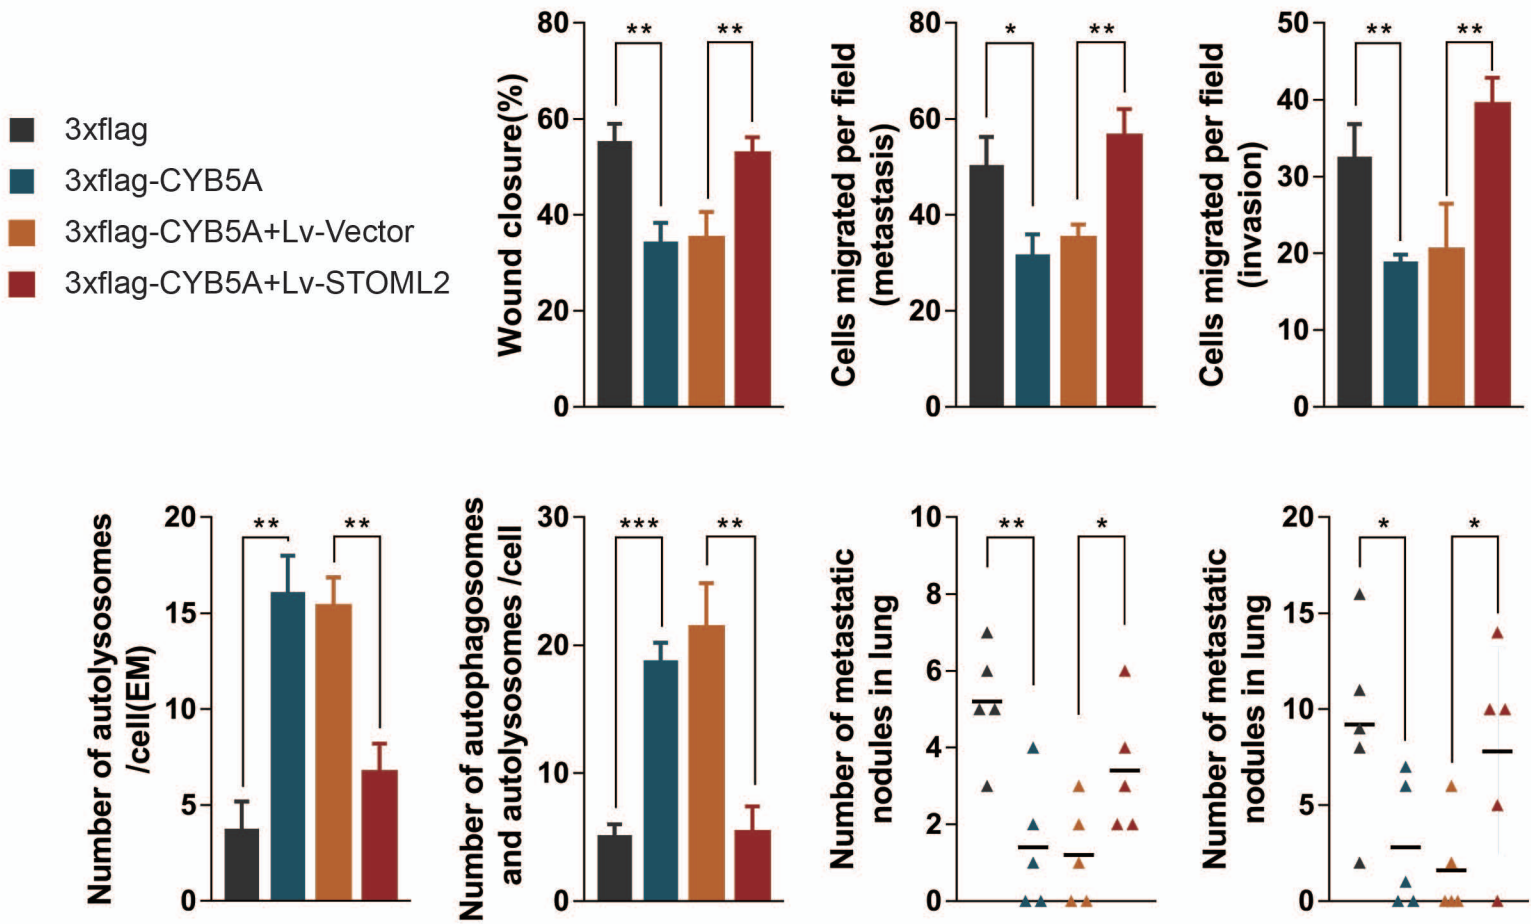

B

Huh-7

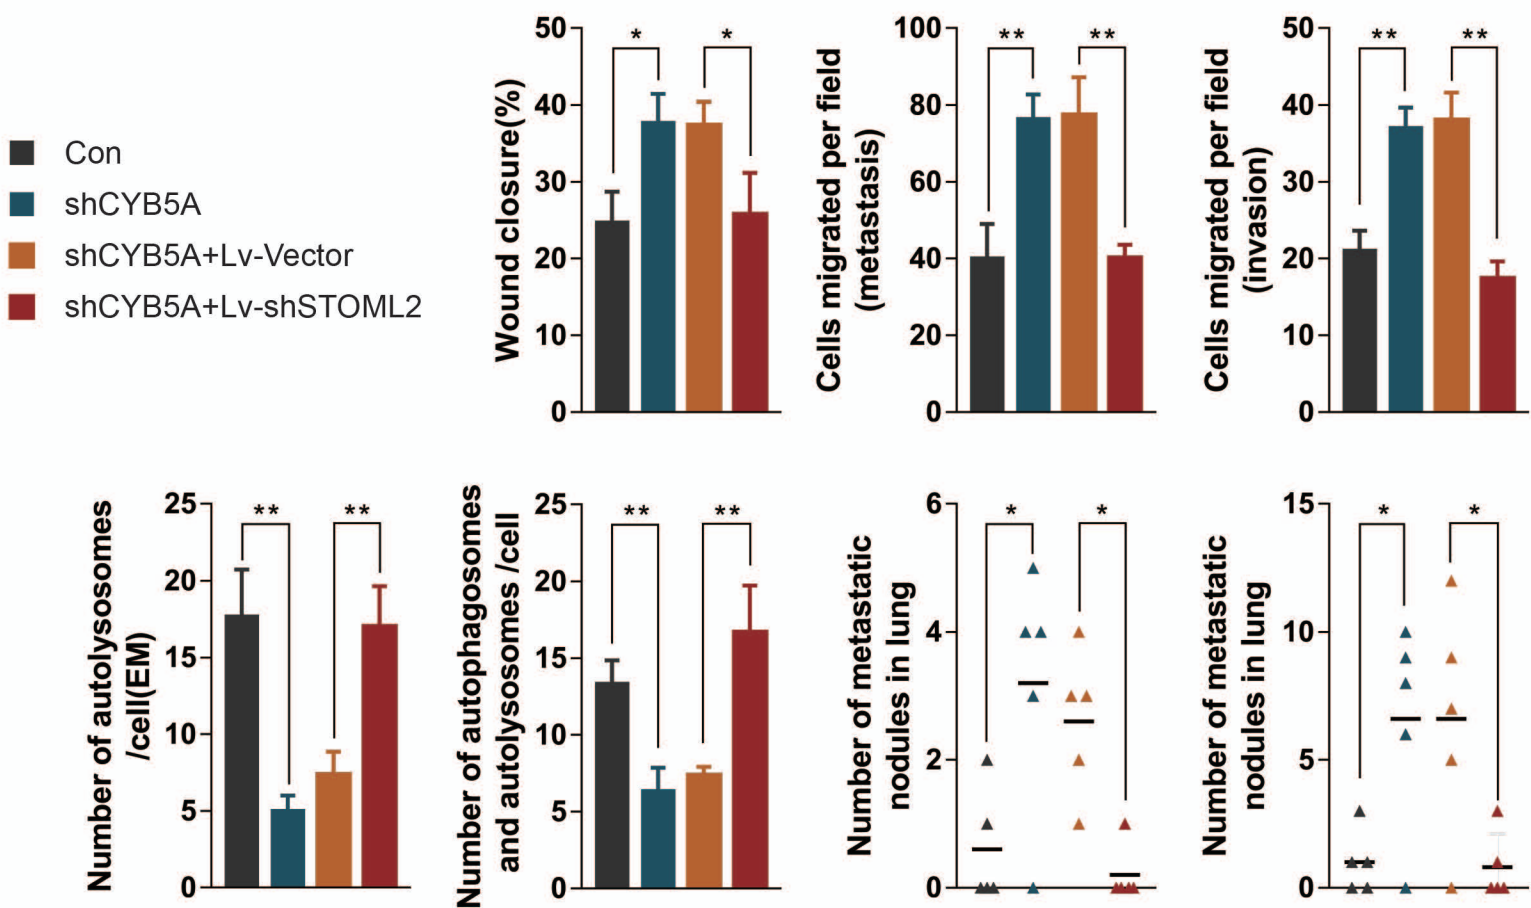

S Figure 6-1

A

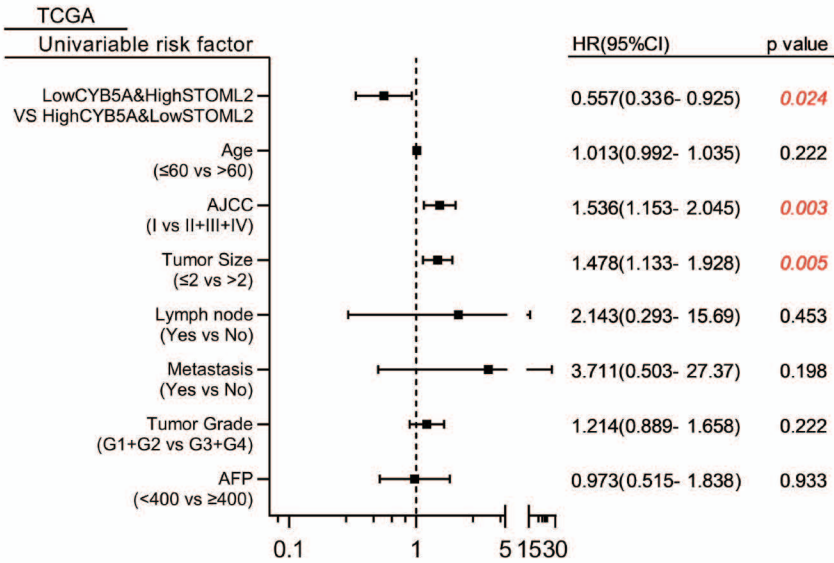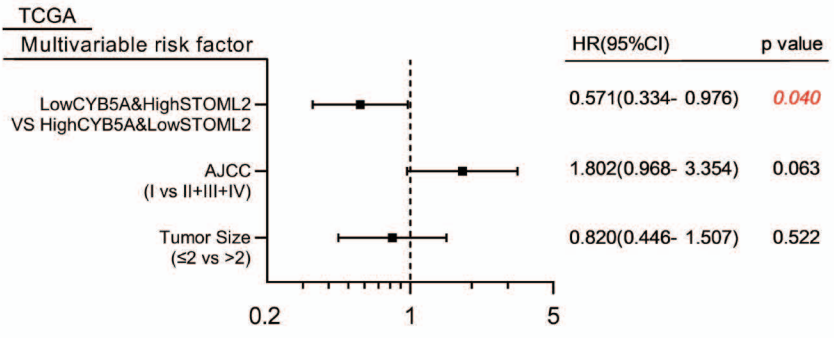

B

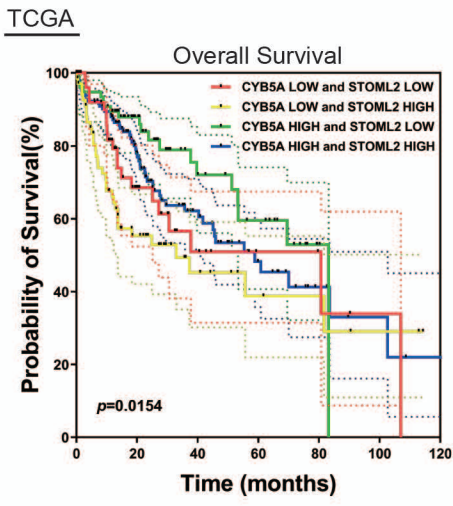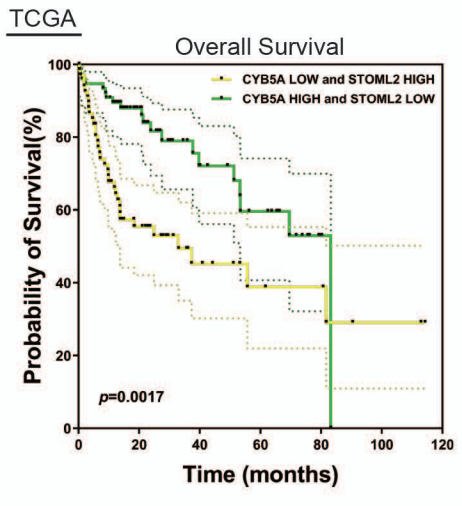

Supplement: 41419_2022_5053_MOESM1_ESM.pdf [file 41419_2022_5053_MOESM1_ESM.pdf]
