# Supplementary material for: Cytochrome B5 type A alleviates HCC metastasis via regulating STOML2 related autophagy and promoting sensitivity to ruxolitinib
Source: PubMed Central journal article supplement (PMC9293983; doi:10.1038/s41419-022-05053-8), 2022-07-18
Supplement: 41419_2022_5053_MOESM13_ESM.pdf [file 41419_2022_5053_MOESM13_ESM.pdf]

|      |                                                   |                    |
|------|---------------------------------------------------|--------------------|
| 主 题: | Re:The change of co-authors about CDDIS-21-4379RR |                    |
| 发件人: | "郭泓瑞" <hongrui7456@163.com>                       | 2022-6-27 14:00:36 |
| 收件人: | liulx@ustc.edu.cn                                 |                    |

Dear Professor Liu:

I accept all the author information changes.

Sincerely yours,  
Hongrui Guo

At 2022-06-27 11:48:19, [liulx@ustc.edu.cn](mailto:liulx@ustc.edu.cn) wrote:

**Dear Authors:**

Our recent manuscript CDDIS-21-4379RR, entitled "Cytochrome B5 Type A alleviates HCC metastasis via regulating STOML2 related autophagy and promoting sensitivity to Ruxolitinib." has been provisionally accepted for publication in Cell Death & Disease, lists you as a co-author. The author information has changed since the original submission.

In particular, I added Jizhou Wang as a co-author in view of his important contribution to the revision process. And I adjusted the order considering the contributions of all authors.

**As the author information has changed, I ask for your opinion:**

If you **agree** with all the final author information, please reply **I accept all the author information changes.**

If you **disagree** with the final author information or have other suggestions, please email me with details.

The changes of Author List and Contributions are as follows:

**Final Author List:**

Hongrui Guo<sup>1\*</sup>, Shuhang Liang<sup>2\*</sup>, Yan Wang<sup>3\*</sup>, Shuo Zhou<sup>2\*</sup>, Dalong Yin<sup>2\*</sup>, Shugeng Zhang<sup>2</sup>, Jizhou Wang<sup>2</sup>, Dehai Wu<sup>1</sup>, Kun Ma<sup>1</sup>, Yufeng Liu<sup>1</sup>, Linmao Sun<sup>1</sup>, Changyong Ji<sup>2</sup>, Xianying Li<sup>2</sup>, Huanran Zhou<sup>2</sup>, Guangchao Yang<sup>1</sup>, Xinyu Guo<sup>1</sup>, Tianming Cui<sup>2</sup>, Zihao Li<sup>1</sup>, Yao Liu<sup>2+</sup>, Jiabei Wang<sup>2+</sup>, Lianxin Liu<sup>1,4+</sup>

**Final Author affiliations:**

1. Department of Hepatic Surgery, Key Laboratory of Hepatosplenic Surgery, Ministry of Education, The First Affiliated Hospital of Harbin Medical University, Harbin, China

2. Department of Hepatobiliary Surgery, Anhui Province Key Laboratory of Hepatopancreatobiliary Surgery, The First Affiliated Hospital of USTC, Division of Life Sciences and Medicine, University of Science and Technology of China, Hefei, Anhui, 230001, China

3. Department of Colorectal Surgery, Harbin Medical University Cancer Hospital, Harbin, 150001 Heilongjiang, China

4. Lead contact

\* These authors contributed equally to this work.

**Final Author contributions:**

Conceptualization, G.HR., L.SH., L.LX., W.JB., L.Y.; Methodology, Y.DL., W.DH., W.Y., Z.S., W.JZ., Z.SG., M.K., L.ZH.; Software, L.YF., S.LM., J.CY., L.XY., Y.GC.; Validation, G.HR., L.SH., Z.HR., L.ZH., G.XY., C.TM.; Formal Analysis, Z.S., Y.DL., L.LX., W.JB., L.Y.; Investigation, G.HR., L.SH., L.LX., W.JB.; Writing - Original Draft, G.HR., Z.SG.; Writing - Review & Editing, Z.HR., L.LX., W.JB., L.Y.; Visualization, G.HR., L.YF., S.LM., J.CY., L.XY., Y.GC.; Funding Acquisition, W.Y., L.Y., W.JB., L.LX.; Resources, L.LX., W.JB., L.Y.; Supervision, L.LX., W.JB., L.Y.

Thank you very much for your time and consideration. Wish you have a nice day!

**Sincerely yours,**

**Lianxin Liu**



|      |                                                    |                    |
|------|----------------------------------------------------|--------------------|
| 主 题: | 回复: The change of co-authors about CDDIS-21-4379RR |                    |
| 发件人: | "我只输给天" <154652031@qq.com>                         | 2022-6-27 12:54:19 |
| 收件人: | liulx <liulx@ustc.edu.cn>                          |                    |

Dear professor Liu:

Thank you for your email. I accept all the author information changes.

Sincerely yours,

Shuhang Liang

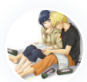

我只输给天

154652031@qq.com

-----原始邮件-----

发件人: "liulx" <liulx@ustc.edu.cn>;

发送时间: 2022年6月27日(星期一) 中午11:48

收件人: "郭泓瑞" <hongrui7456@163.com>; "我只输给天" <154652031@qq.com>; "wangyan2016md" <wangyan2016md@126.com>; "zhouwill01" <zhouwill01@163.com>; "尹大龙" <dalong48@163.com>; "张树庚" <shugeng517@163.com>; "王继洲" <wangjizhou1984@hotmail.com>; "tianxiadiyi\_12345" <tianxiadiyi\_12345@126.com>; "1694769800" <1694769800@qq.com>; "413951217" <413951217@qq.com>; "lemonzhutou" <lemonzhutou@163.com>; "cyji" <cyji@mail.ustc.edu.cn>; "lidonglps" <lidonglps@qq.com>; "drzhr1026" <drzhr1026@hotmail.com>; "ygc1988" <ygc1988@sina.com>; "1006065333" <1006065333@qq.com>; "1241346394" <1241346394@qq.com>; "1254007965" <1254007965@qq.com>; "刘尧" <liuyao66@ustc.edu.cn>; "jbbwang16" <jbbwang16@ustc.edu.cn>;

主题: The change of co-authors about CDDIS-21-4379RR

**Dear Authors:**

Our recent manuscript CDDIS-21-4379RR, entitled "Cytochrome B5 Type A alleviates HCC metastasis via regulating STOML2 related autophagy and promoting sensitivity to Ruxolitinib." has been provisionally accepted for publication in Cell Death & Disease, lists you as a co-author. The author information has changed since the original submission.

In particular, I added Jizhou Wang as a co-author in view of his important contribution to the revision process. And I adjusted the order considering the contributions of all authors.

**As the author information has changed, I ask for your opinion:**

If you **agree** with all the final author information, please reply **I accept all the author information changes**.

If you **disagree** with the final author information or have other suggestions, please email me with details.

The changes of Author List and Contributions are as follows:

## **Final Author List:**

Hongrui Guo<sup>1\*</sup>, Shuhang Liang<sup>2\*</sup>, Yan Wang<sup>3\*</sup>, Shuo Zhou<sup>2\*</sup>, Dalong Yin<sup>2\*</sup>, Shugeng Zhang<sup>2</sup>, Jizhou Wang<sup>2</sup>, Dehai Wu<sup>1</sup>, Kun Ma<sup>1</sup>, Yufeng Liu<sup>1</sup>, Linmao Sun<sup>1</sup>, Changyong Ji<sup>2</sup>, Xianying Li<sup>2</sup>, Huanran Zhou<sup>2</sup>, Guangchao Yang<sup>1</sup>, Xinyu Guo<sup>1</sup>, Tianming Cui<sup>2</sup>, Zihao Li<sup>1</sup>, Yao Liu<sup>2+</sup>, Jiabei Wang<sup>2+</sup>, Lianxin Liu<sup>1,4+</sup>

## **Final Author affiliations:**

1.Department of Hepatic Surgery, Key Laboratory of Hepatosplenic Surgery, Ministry of Education, The First Affiliated Hospital of Harbin Medical University, Harbin, China

2.Department of Hepatobiliary Surgery, Anhui Province Key Laboratory of Hepatopancreatobiliary Surgery, The First Affiliated Hospital of USTC, Division of Life Sciences and Medicine, University of Science and Technology of China, Hefei, Anhui, 230001, China

3.Department of Colorectal Surgery, Harbin Medical University Cancer Hospital, Harbin, 150001 Heilongjiang, China

4. Lead contact

\* These authors contributed equally to this work.

## **Final Author contributions:**

Conceptualization, G.HR., L.SH., L.LX., W.JB., L.Y.; Methodology, Y.DL., W.DH., W.Y., Z.S., W.JZ., Z.SG., M.K., L.ZH.; Software, L.YF., S.LM., J.CY., L.XY., Y.GC.; Validation, G.HR., L.SH., Z.HR., L.ZH., G.XY., C.TM.; Formal Analysis, Z.S., Y.DL., L.LX., W.JB., L.Y.; Investigation, G.HR., L.SH., L.LX., W.JB.; Writing - Original Draft, G.HR., Z.SG.; Writing - Review & Editing, Z.HR., L.LX., W.JB., L.Y.; Visualization, G.HR., L.YF., S.LM., J.CY., L.XY., Y.GC.; Funding Acquisition, W.Y., L.Y., W.JB., L.LX.; Resources, L.LX., W.JB., L.Y.; Supervision, L.LX., W.JB., L.Y.

Thank you very much for your time and consideration. Wish you have a nice day!

**Sincerely yours,**

**Lianxin Liu**

|      |                                                    |                    |
|------|----------------------------------------------------|--------------------|
| 主 题: | 回复: The change of co-authors about CDDIS-21-4379RR |                    |
| 发件人: | "王岩" <wangyan2016md@126.com>                       | 2022-6-27 13:15:29 |
| 收件人: | liulx <liulx@ustc.edu.cn>                          |                    |

Dear Professor Lianxin Liu,  
I accept all the author information changes.  
Sincerely, Yan Wang

---- 回复的原邮件 ----

发件人 [liulx@ustc.edu.cn](mailto:liulx@ustc.edu.cn)<liulx@ustc.edu.cn>

日期 2022年06月27日 11:48

收件人 [郭泓瑞](mailto:hongrui7456@163.com)<hongrui7456@163.com>、[梁书航](mailto:liangshuhang@163.com)<154652031@qq.com>、[wangyan2016md@126.com](mailto:wangyan2016md@126.com)<wangyan2016md@126.com>、[zhouwill01@163.com](mailto:zhouwill01@163.com)<zhouwill01@163.com>、[尹大龙](mailto:dalong48@163.com)<dalong48@163.com>、[张树庚](mailto:zhangshugeng517@163.com)<shugeng517@163.com>、[王继洲](mailto:wangjizhou1984@hotmail.com)<wangjizhou1984@hotmail.com>、[tianxiadiyi\\_12345@126.com](mailto:tianxiadiyi_12345@126.com)<tianxiadiyi\_12345@126.com>、[1694769800@qq.com](mailto:1694769800@qq.com)<1694769800@qq.com>、[413951217](mailto:413951217@qq.com)<413951217@qq.com>、[lemonzhutou@163.com](mailto:lemonzhutou@163.com)<lemonzhutou@163.com>、[cyji@mail.ustc.edu.cn](mailto:cyji@mail.ustc.edu.cn)<cyji@mail.ustc.edu.cn>、[lidonglps@qq.com](mailto:lidonglps@qq.com)<lidonglps@qq.com>、[drzhr1026@hotmail.com](mailto:drzhr1026@hotmail.com)<drzhr1026@hotmail.com>、[ygc1988@sina.com](mailto:ygc1988@sina.com)<ygc1988@sina.com>、[1006065333@qq.com](mailto:1006065333@qq.com)<1006065333@qq.com>、[1241346394](mailto:1241346394@qq.com)<1241346394@qq.com>、[1254007965@qq.com](mailto:1254007965@qq.com)<1254007965@qq.com>、[刘尧](mailto:liuyao66@ustc.edu.cn)<liuyao66@ustc.edu.cn>、[jbwang16](mailto:jbwang16@ustc.edu.cn)<jbwang16@ustc.edu.cn>

主题 The change of co-authors about CDDIS-21-4379RR

## Dear Authors:

Our recent manuscript CDDIS-21-4379RR, entitled "Cytochrome B5 Type A alleviates HCC metastasis via regulating STOML2 related autophagy and promoting sensitivity to Ruxolitinib." has been provisionally accepted for publication in Cell Death & Disease, lists you as a co-author. The author information has changed since the original submission.

In particular, I added Jizhou Wang as a co-author in view of his important contribution to the revision process. And I adjusted the order considering the contributions of all authors.

## As the author information has changed, I ask for your opinion:

If you **agree** with all the final author information, please reply **I accept all the author information changes**.

If you **disagree** with the final author information or have other suggestions, please email me with details.

The changes of Author List and Contributions are as follows:

## Final Author List:

Hongrui Guo<sup>1\*</sup>, Shuhang Liang<sup>2\*</sup>, Yan Wang<sup>3\*</sup>, Shuo Zhou<sup>2\*</sup>, Dalong Yin<sup>2\*</sup>, Shugeng Zhang<sup>2</sup>, Jizhou Wang<sup>2</sup>, Dehai Wu<sup>1</sup>, Kun Ma<sup>1</sup>, Yufeng Liu<sup>1</sup>, Linmao Sun<sup>1</sup>, Changyong Ji<sup>2</sup>, Xianying Li<sup>2</sup>, Huanran Zhou<sup>2</sup>, Guangchao Yang<sup>1</sup>, Xinyu Guo<sup>1</sup>, Tianming Cui<sup>2</sup>, Zihao Li<sup>1</sup>, Yao Liu<sup>2+</sup>, Jiabei Wang<sup>2+</sup>, Lianxin Liu<sup>1,4+</sup>

**Final Author affiliations:**

1. Department of Hepatic Surgery, Key Laboratory of Hepatosplenic Surgery, Ministry of Education, The First Affiliated Hospital of Harbin Medical University, Harbin, China

2. Department of Hepatobiliary Surgery, Anhui Province Key Laboratory of Hepatopancreatobiliary Surgery, The First Affiliated Hospital of USTC, Division of Life Sciences and Medicine, University of Science and Technology of China, Hefei, Anhui, 230001, China

3. Department of Colorectal Surgery, Harbin Medical University Cancer Hospital, Harbin, 150001 Heilongjiang, China

4. Lead contact

\* These authors contributed equally to this work.

**Final Author contributions:**

Conceptualization, G.HR., L.SH., L.LX., W.JB., L.Y.; Methodology, Y.DL., W.DH., W.Y., Z.S., W.JZ., Z.SG., M.K., L.ZH.; Software, L.YF., S.LM., J.CY., L.XY., Y.GC.; Validation, G.HR., L.SH, Z.HR., L.ZH., G.XY., C.TM.; Formal Analysis, Z.S., Y.DL., L.LX., W.JB., L.Y.; Investigation, G.HR., L.SH, L.LX., W.JB.; Writing - Original Draft, G.HR., Z.SG.; Writing - Review & Editing, Z.HR., L.LX., W.JB., L.Y.; Visualization, G.HR., L.YF., S.LM., J.CY., L.XY., Y.GC.; Funding Acquisition, W.Y., L.Y., W.JB., L.LX.; Resources, L.LX., W.JB., L.Y.; Supervision, L.LX., W.JB., L.Y..

Thank you very much for your time and consideration. Wish you have a nice day!

**Sincerely yours,**

**Lianxin Liu**

|      |                                                   |                    |
|------|---------------------------------------------------|--------------------|
| 主 题: | Re:The change of co-authors about CDDIS-21-4379RR |                    |
| 发件人: | "周烁" <zhouwill01@163.com>                         | 2022-6-27 13:04:10 |
| 收件人: | liulx@ustc.edu.cn                                 |                    |

**Dear Professor Liu:**

**I accept all the author information changes.**

**Best wishes.**

**zhou shuo**

At 2022-06-27 11:48:19, [liulx@ustc.edu.cn](mailto:liulx@ustc.edu.cn) wrote:

**Dear Authors:**

Our recent manuscript CDDIS-21-4379RR, entitled "Cytochrome B5 Type A alleviates HCC metastasis via regulating STOML2 related autophagy and promoting sensitivity to Ruxolitinib." has been provisionally accepted for publication in Cell Death & Disease, lists you as a co-author. The author information has changed since the original submission.

In particular, I added Jizhou Wang as a co-author in view of his important contribution to the revision process. And I adjusted the order considering the contributions of all authors.

**As the author information has changed, I ask for your opinion:**

If you **agree** with all the final author information, please reply **I accept all the author information changes.**

If you **disagree** with the final author information or have other suggestions, please email me with details.

The changes of Author List and Contributions are as follows:



**Final Author List:**

Hongrui Guo<sup>1\*</sup>, Shuhang Liang<sup>2\*</sup>, Yan Wang<sup>3\*</sup>, Shuo Zhou<sup>2\*</sup>, Dalong Yin<sup>2\*</sup>, Shugeng Zhang<sup>2</sup>, Jizhou Wang<sup>2</sup>, Dehai Wu<sup>1</sup>, Kun Ma<sup>1</sup>, Yufeng Liu<sup>1</sup>, Linmao Sun<sup>1</sup>, Changyong Ji<sup>2</sup>, Xianying Li<sup>2</sup>, Huanran Zhou<sup>2</sup>, Guangchao Yang<sup>1</sup>, Xinyu Guo<sup>1</sup>, Tianming Cui<sup>2</sup>, Zihao Li<sup>1</sup>, Yao Liu<sup>2+</sup>, Jiabei Wang<sup>2+</sup>, Lianxin Liu<sup>1,4+</sup>

**Final Author affiliations:**

1. Department of Hepatic Surgery, Key Laboratory of Hepatosplenic Surgery, Ministry of Education, The First Affiliated Hospital of Harbin Medical University, Harbin, China

2. Department of Hepatobiliary Surgery, Anhui Province Key Laboratory of Hepatopancreatobiliary Surgery, The First Affiliated Hospital of USTC, Division of Life Sciences and Medicine, University of Science and Technology of China, Hefei, Anhui, 230001, China

3. Department of Colorectal Surgery, Harbin Medical University Cancer Hospital, Harbin, 150001 Heilongjiang, China

4. Lead contact

\* These authors contributed equally to this work.

**Final Author contributions:**

Conceptualization, G.HR., L.SH., L.LX., W.JB., L.Y.; Methodology, Y.DL., W.DH., W.Y., Z.S., W.JZ., Z.SG., M.K., L.ZH.; Software, L.YF., S.LM., J.CY., L.XY., Y.GC.; Validation, G.HR., L.SH., Z.HR., L.ZH., G.XY., C.TM.; Formal Analysis, Z.S., Y.DL., L.LX., W.JB., L.Y.; Investigation, G.HR., L.SH., L.LX., W.JB.; Writing - Original Draft, G.HR., Z.SG.; Writing - Review & Editing, Z.HR., L.LX., W.JB., L.Y.; Visualization, G.HR., L.YF., S.LM., J.CY., L.XY., Y.GC.; Funding Acquisition, W.Y., L.Y., W.JB., L.LX.; Resources, L.LX., W.JB., L.Y.; Supervision, L.LX., W.JB., L.Y.

Thank you very much for your time and consideration. Wish you have a nice day!

**Sincerely yours,**

**Lianxin Liu**



|      |                                                   |                    |
|------|---------------------------------------------------|--------------------|
| 主 题: | Re:The change of co-authors about CDDIS-21-4379RR |                    |
| 发件人: | DALONG <dalong48@163.com>                         | 2022-6-27 14:04:03 |
| 收件人: | liulx@ustc.edu.cn                                 |                    |

Dear Prof. Liu,

**I accept all the author information changes.**

**Best Regards**

**Dalong Yin**

At 2022-06-27 11:48:19, [liulx@ustc.edu.cn](mailto:liulx@ustc.edu.cn) wrote:

**Dear Authors:**

Our recent manuscript CDDIS-21-4379RR, entitled "Cytochrome B5 Type A alleviates HCC metastasis via regulating STOML2 related autophagy and promoting sensitivity to Ruxolitinib." has been provisionally accepted for publication in Cell Death & Disease, lists you as a co-author. The author information has changed since the original submission.

In particular, I added Jizhou Wang as a co-author in view of his important contribution to the revision process. And I adjusted the order considering the contributions of all authors.

**As the author information has changed, I ask for your opinion:**

If you **agree** with all the final author information, please reply **I accept all the author information changes.**

If you **disagree** with the final author information or have other suggestions, please email me with details.

The changes of Author List and Contributions are as follows:

**Final Author List:**

Hongrui Guo<sup>1\*</sup>, Shuhang Liang<sup>2\*</sup>, Yan Wang<sup>3\*</sup>, Shuo Zhou<sup>2\*</sup>, Dalong Yin<sup>2\*</sup>, Shugeng Zhang<sup>2</sup>, Jizhou Wang<sup>2</sup>, Dehai Wu<sup>1</sup>, Kun Ma<sup>1</sup>, Yufeng Liu<sup>1</sup>, Linmao Sun<sup>1</sup>, Changyong Ji<sup>2</sup>, Xianying Li<sup>2</sup>, Huanran Zhou<sup>2</sup>, Guangchao Yang<sup>1</sup>, Xinyu Guo<sup>1</sup>, Tianming Cui<sup>2</sup>, Zihao Li<sup>1</sup>, Yao Liu<sup>2+</sup>, Jiabei Wang<sup>2+</sup>, Lianxin Liu<sup>1,4+</sup>

**Final Author affiliations:**

1. Department of Hepatic Surgery, Key Laboratory of Hepatosplenic Surgery, Ministry of Education, The First Affiliated Hospital of Harbin Medical University, Harbin, China

2. Department of Hepatobiliary Surgery, Anhui Province Key Laboratory of Hepatopancreatobiliary Surgery, The First Affiliated Hospital of USTC, Division of Life Sciences and Medicine, University of Science and Technology of China, Hefei, Anhui, 230001, China

3. Department of Colorectal Surgery, Harbin Medical University Cancer Hospital, Harbin, 150001 Heilongjiang, China

4. Lead contact

\* These authors contributed equally to this work.

**Final Author contributions:**

Conceptualization, G.HR., L.SH., L.LX., W.JB., L.Y.; Methodology, Y.DL., W.DH., W.Y., Z.S., W.JZ., Z.SG., M.K., L.ZH.; Software, L.YF., S.LM., J.CY., L.XY., Y.GC.; Validation, G.HR., L.SH, Z.HR., L.ZH., G.XY., C.TM.; Formal Analysis, Z.S., Y.DL., L.LX., W.JB., L.Y.; Investigation, G.HR., L.SH, L.LX., W.JB.; Writing - Original Draft, G.HR., Z.SG.; Writing - Review & Editing, Z.HR., L.LX., W.JB., L.Y.; Visualization, G.HR., L.YF., S.LM., J.CY., L.XY., Y.GC.; Funding Acquisition, W.Y., L.Y., W.JB., L.LX.; Resources, L.LX., W.JB., L.Y.; Supervision, L.LX., W.JB., L.Y..

Thank you very much for your time and consideration. Wish you have a nice day!

**Sincerely yours,**

**Lianxin Liu**

|      |                                                   |                    |
|------|---------------------------------------------------|--------------------|
| 主 题: | Re:The change of co-authors about CDDIS-21-4379RR |                    |
| 发件人: | "张树庚" <shugeng517@163.com>                        | 2022-6-27 14:43:45 |
| 收件人: | liulx@ustc.edu.cn                                 |                    |

**Dear Professor Liu:**

**I accept all the author information changes.**

**Best wishes.**

**Zhang Shugeng**

At 2022-06-27 11:48:19, [liulx@ustc.edu.cn](mailto:liulx@ustc.edu.cn) wrote:

**Dear Authors:**

Our recent manuscript CDDIS-21-4379RR, entitled "Cytochrome B5 Type A alleviates HCC metastasis via regulating STOML2 related autophagy and promoting sensitivity to Ruxolitinib." has been provisionally accepted for publication in Cell Death & Disease, lists you as a co-author. The author information has changed since the original submission.

In particular, I added Jizhou Wang as a co-author in view of his important contribution to the revision process. And I adjusted the order considering the contributions of all authors.

**As the author information has changed, I ask for your opinion:**

If you **agree** with all the final author information, please reply **I accept all the author information changes.**

If you **disagree** with the final author information or have other suggestions, please email me with details.

The changes of Author List and Contributions are as follows:

**Final Author List:**

Hongrui Guo<sup>1\*</sup>, Shuhang Liang<sup>2\*</sup>, Yan Wang<sup>3\*</sup>, Shuo Zhou<sup>2\*</sup>, Dalong Yin<sup>2\*</sup>, Shugeng Zhang<sup>2</sup>, Jizhou Wang<sup>2</sup>, Dehai Wu<sup>1</sup>, Kun Ma<sup>1</sup>, Yufeng Liu<sup>1</sup>, Linmao Sun<sup>1</sup>, Changyong Ji<sup>2</sup>, Xianying Li<sup>2</sup>, Huanran Zhou<sup>2</sup>, Guangchao Yang<sup>1</sup>, Xinyu Guo<sup>1</sup>, Tianming Cui<sup>2</sup>, Zihao Li<sup>1</sup>, Yao Liu<sup>2+</sup>, Jiabei Wang<sup>2+</sup>, Lianxin Liu<sup>1,4+</sup>

**Final Author affiliations:**

1.Department of Hepatic Surgery, Key Laboratory of Hepatosplenic Surgery, Ministry of Education, The First Affiliated Hospital of Harbin Medical University, Harbin, China

2.Department of Hepatobiliary Surgery, Anhui Province Key Laboratory of Hepatopancreatobiliary Surgery, The First Affiliated Hospital of USTC, Division of Life Sciences and Medicine, University of Science and Technology of China, Hefei, Anhui, 230001, China

3.Department of Colorectal Surgery, Harbin Medical University Cancer Hospital, Harbin, 150001 Heilongjiang, China

4. Lead contact

\* These authors contributed equally to this work.

**Final Author contributions:**

Conceptualization, G.HR., L.SH., L.LX., W.JB., L.Y.; Methodology, Y.DL., W.DH., W.Y., Z.S., W.JZ., Z.SG., M.K., L.ZH.; Software, L.YF., S.LM., J.CY., L.XY., Y.GC.; Validation, G.HR., L.SH, Z.HR., L.ZH., G.XY., C.TM.; Formal Analysis, Z.S.,Y.DL.,L.LX., W.JB., L.Y.; Investigation, G.HR., L.SH, L.LX., W.JB.; Writing - Original Draft, G.HR., Z.SG.; Writing - Review & Editing, Z.HR., L.LX., W.JB., L.Y.; Visualization, G.HR., L.YF., S.LM., J.CY., L.XY., Y.GC.; Funding Acquisition, W.Y., L.Y., W.JB., L.LX.; Resources, L.LX., W.JB., L.Y.; Supervision, L.LX., W.JB., L.Y..

Thank you very much for your time and consideration. Wish you have a nice day!

**Sincerely yours,**

**Lianxin Liu**



|      |                                                    |                   |
|------|----------------------------------------------------|-------------------|
| 主 题: | Re: The change of co-authors about CDDIS-21-4379RR |                   |
| 发件人: | "wangjoe@ustc.edu.cn" <wangjoe@ustc.edu.cn>        | 2022-6-28 7:28:59 |
| 收件人: | liulx <liulx@ustc.edu.cn>                          |                   |

Dear Professor Lianxin Liu,  
I accept all the author information changes.

Jizhou Wang

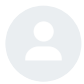

**wangjoe@ustc.edu.cn**

邮箱: wangjoe@ustc.edu.cn

---- 回复的原邮件 ----

发件人 [liulx<liulx@ustc.edu.cn>](mailto:liulx@ustc.edu.cn)  
日期 2022年06月27日 14:23  
收件人 [wangjoe<wangjoe@ustc.edu.cn>](mailto:wangjoe@ustc.edu.cn)  
主题 The change of co-authors about CDDIS-21-4379RR

Dear Authors: Our recent manuscript CDDIS-21-4379RR, entitled "Cytochrome B5 Type A alleviates HCC metastasis via regulating STOML2 related autophagy and promoting sensitivity to Ruxolitinib." has been provisionally accepted for publication in Cell Death & Disease, lists you as a co-author. The author information has changed since the original submission. In particular, I added Jizhou Wang as a co-author in view of his important contribution to the revision process. And I adjusted the order considering the contributions of all authors. As the author information has changed, I ask for your opinion: If you agree with all the final author information, please reply I accept all the author information changes. If you disagree with the final author information or have other suggestions, please email me with details. The changes of Author List and Contributions are as follows: Final Author List: Hongrui Guo<sup>1\*</sup>, Shuhang Liang<sup>2\*</sup>, Yan Wang<sup>3\*</sup>, Shuo Zhou<sup>2\*</sup>, Dalong Yin<sup>2\*</sup>, Shugeng Zhang<sup>2</sup>, Jizhou Wang<sup>2</sup>, Dehai Wu<sup>1</sup>, Kun Ma<sup>1</sup>, Yufeng Liu<sup>1</sup>, Linmao Sun<sup>1</sup>, Changyong Ji<sup>2</sup>, Xianying Li<sup>2</sup>, Huanran Zhou<sup>2</sup>, Guangchao Yang<sup>1</sup>, Xinyu Guo<sup>1</sup>, Tianming Cui<sup>2</sup>, Zihao Li<sup>1</sup>, Yao Liu<sup>2+</sup>, Jiabei Wang<sup>2+</sup>, Lianxin Liu<sup>1,4+</sup> Final Author affiliations: 1. Department of Hepatic Surgery, Key Laboratory of Hepatosplenic Surgery, Ministry of Education, The First Affiliated Hospital of Harbin Medical University, Harbin, China 2. Department of Hepatobiliary Surgery, Anhui Province Key Laboratory of Hepatopancreatobiliary Surgery, The First Affiliated Hospital of USTC, Division of Life Sciences and Medicine, University of Science and Technology of China, Hefei, Anhui, 230001, China 3. Department of Colorectal Surgery, Harbin Medical University Cancer Hospital, Harbin, 150001 Heilongjiang, China 4. Lead contact\* These authors contributed equally to this work. Final Author contributions: Conceptualization, G.H.R., L.S.H., L.L.X., W.J.B., L.Y.; Methodology, Y.D.L., W.D.H., W.Y., Z.S., W.J.Z., Z.S.G., M.K., L.Z.H.; Software, L.Y.F., S.L.M., J.C.Y., L.X.Y., Y.G.C.; Validation, G.H.R., L.S.H., Z.H.R., L.Z.H., G.X.Y., C.T.M.; Formal Analysis, Z.S., Y.D.L., L.L.X., W.J.B., L.Y.; Investigation, G.H.R., L.S.H., L.L.X., W.J.B.; Writing - Original Draft, G.H.R., Z.S.G.; Writing - Review & Editing, Z.H.R., L.L.X., W.J.B., L.Y.; Visualization, G.H.R., L.Y.F., S.L.M., J.C.Y., L.X.Y., Y.G.C.; Funding Acquisition, W.Y., L.Y., W.J.B., L.L.X.; Resources, L.L.X., W.J.B., L.Y.; Supervision, L.L.X., W.J.B., L.Y.. Thank you very much for your time and consideration. Wish you have a nice day! Sincerely yours, Lianxin Liu



|      |                                                                                                                                                                                                                                                                                                                                                                                                                                                                                                                                                                                                                                                                                                                                                                          |                    |
|------|--------------------------------------------------------------------------------------------------------------------------------------------------------------------------------------------------------------------------------------------------------------------------------------------------------------------------------------------------------------------------------------------------------------------------------------------------------------------------------------------------------------------------------------------------------------------------------------------------------------------------------------------------------------------------------------------------------------------------------------------------------------------------|--------------------|
| 主 题: | 回复: The change of co-authors about CDDIS-21-4379RR                                                                                                                                                                                                                                                                                                                                                                                                                                                                                                                                                                                                                                                                                                                       |                    |
| 发件人: | "Dr. Wu" <tianxiadiyi_12345@126.com>                                                                                                                                                                                                                                                                                                                                                                                                                                                                                                                                                                                                                                                                                                                                     | 2022-6-27 16:11:49 |
| 收件人: | "liulx@ustc.edu.cn" <liulx@ustc.edu.cn>, "郭泓瑞" <hongrui7456@163.com>, "梁书航" <154652031@qq.com>, "wangyan2016md@126.com" <wangyan2016md@126.com>, "zhouwill01@163.com" <zhouwill01@163.com>, "尹大龙" <dalong48@163.com>, "张树庚" <shugeng517@163.com>, "王继洲" <wangjizhou1984@hotmail.com>, "1694769800@qq.com" <1694769800@qq.com>, 413951217 <413951217@qq.com>, "lemonzhutou@163.com" <lemonzhutou@163.com>, "cyji@mail.ustc.edu.cn" <cyji@mail.ustc.edu.cn>, "lidonglps@qq.com" <lidonglps@qq.com>, "drzhr1026@hotmail.com" <drzhr1026@hotmail.com>, "ygc1988@sina.com" <ygc1988@sina.com>, "1006065333@qq.com" <1006065333@qq.com>, 1241346394 <1241346394@qq.com>, "1254007965@qq.com" <1254007965@qq.com>, "刘尧" <liuyao66@ustc.edu.cn>, jbwang16 <jbwang16@ustc.edu.cn> |                    |

Dear Professor Lianxin Liu,  
I accept all the author information changes.

Dehai Wu

发自我的手机

----- 原始邮件 -----

发件人: liulx@ustc.edu.cn

日期: 2022年6月27日周一 中午11:48

收件人: 郭泓瑞 <hongrui7456@163.com>, 梁书航 <154652031@qq.com>, wangyan2016md@126.com, zhouwill01@163.com, 尹大龙 <dalong48@163.com>, 张树庚 <shugeng517@163.com>, 王继洲 <wangjizhou1984@hotmail.com>, tianxiadiyi\_12345@126.com, 1694769800@qq.com, 413951217 <413951217@qq.com>, lemonzhutou@163.com, cyji@mail.ustc.edu.cn, lidonglps@qq.com, drzhr1026@hotmail.com, ygc1988@sina.com, 1006065333@qq.com, 1241346394 <1241346394@qq.com>, 1254007965@qq.com, 刘尧 <liuyao66@ustc.edu.cn>, jbwang16 <jbwang16@ustc.edu.cn>

主题: The change of co-authors about CDDIS-21-4379RR

### Dear Authors:

Our recent manuscript CDDIS-21-4379RR, entitled "Cytochrome B5 Type A alleviates HCC metastasis via regulating STOML2 related autophagy and promoting sensitivity to Ruxolitinib." has been provisionally accepted for publication in Cell Death & Disease, lists you as a co-author. The author information has changed since the original submission.

In particular, I added Jizhou Wang as a co-author in view of his important contribution to the revision process. And I adjusted the order considering the contributions of all authors.

### As the author information has changed, I ask for your opinion:

If you **agree** with all the final author information, please reply **I accept all the author information changes**.

If you **disagree** with the final author information or have other suggestions, please email me with details.

The changes of Author List and Contributions are as follows:

### **Final Author List:**

Hongrui Guo<sup>1\*</sup>, Shuhang Liang<sup>2\*</sup>, Yan Wang<sup>3\*</sup>, Shuo Zhou<sup>2\*</sup>, Dalong Yin<sup>2\*</sup>, Shugeng Zhang<sup>2</sup>, Jizhou Wang<sup>2</sup>, Dehai Wu<sup>1</sup>, Kun Ma<sup>1</sup>, Yufeng Liu<sup>1</sup>, Linmao Sun<sup>1</sup>, Changyong Ji<sup>2</sup>, Xianying Li<sup>2</sup>, Huanran Zhou<sup>2</sup>, Guangchao Yang<sup>1</sup>, Xinyu Guo<sup>1</sup>, Tianming Cui<sup>2</sup>, Zihao Li<sup>1</sup>, Yao Liu<sup>2+</sup>, Jiabei Wang<sup>2+</sup>, Lianxin Liu<sup>1,4+</sup>

### **Final Author affiliations:**

1.Department of Hepatic Surgery, Key Laboratory of Hepatosplenic Surgery, Ministry of Education, The First Affiliated Hospital of Harbin Medical University, Harbin, China

2.Department of Hepatobiliary Surgery, Anhui Province Key Laboratory of Hepatopancreatobiliary Surgery, The First Affiliated Hospital of USTC, Division of Life Sciences and Medicine, University of Science and Technology of China, Hefei, Anhui, 230001, China

3.Department of Colorectal Surgery, Harbin Medical University Cancer Hospital, Harbin, 150001 Heilongjiang, China

4. Lead contact

\* These authors contributed equally to this work.

### **Final Author contributions:**

Conceptualization, G.HR., L.SH., L.LX., W.JB., L.Y.; Methodology, Y.DL., W.DH., W.Y., Z.S., W.JZ., Z.SG., M.K., L.ZH.; Software, L.YF., S.LM., J.CY., L.XY., Y.GC.; Validation, G.HR., L.SH, Z.HR., L.ZH., G.XY., C.TM.; Formal Analysis, Z.S.,Y.DL.,L.LX., W.JB., L.Y.; Investigation, G.HR., L.SH, L.LX., W.JB.; Writing - Original Draft, G.HR., Z.SG.; Writing - Review & Editing, Z.HR., L.LX., W.JB., L.Y.; Visualization, G.HR., L.YF., S.LM., J.CY., L.XY., Y.GC.; Funding Acquisition, W.Y., L.Y., W.JB., L.LX.; Resources, L.LX., W.JB., L.Y.; Supervision, L.LX., W.JB., L.Y..

Thank you very much for your time and consideration. Wish you have a nice day!

**Sincerely yours,**

**Lianxin Liu**

|      |                                                    |                    |
|------|----------------------------------------------------|--------------------|
| 主题:  | Re: The change of co-authors about CDDIS-21-4379RR |                    |
| 发件人: | MK <1694769800@qq.com>                             | 2022-6-27 14:29:17 |
| 收件人: | liulx <liulx@ustc.edu.cn>                          |                    |

Dear Professor Lianxin Liu,  
I accept all the author information changes.  
Kun Ma

---Original---

**From:** "liulx" <liulx@ustc.edu.cn>  
**Date:** Mon, Jun 27, 2022 11:48 AM  
**To:** "郭泓瑞" <hongrui7456@163.com>; "梁书航" <154652031@qq.com>; "wangyan2016md" <wangyan2016md@126.com>; "zhouwill01" <zhouwill01@163.com>; "尹大龙" <dalong48@163.com>; "张树庚" <shugeng517@163.com>; "王继洲" <wangjizhou1984@hotmail.com>; "tianxiadiyi\_12345" <tianxiadiyi\_12345@126.com>; "1694769800" <1694769800@qq.com>; "413951217" <413951217@qq.com>; "lemonzhutou" <lemonzhutou@163.com>; "cyji" <cyji@mail.ustc.edu.cn>; "lidonglps" <lidonglps@qq.com>; "drzhr1026" <drzhr1026@hotmail.com>; "ygc1988" <ygc1988@sina.com>; "1006065333" <1006065333@qq.com>; "1241346394" <1241346394@qq.com>; "1254007965" <1254007965@qq.com>; "刘尧" <liuyao66@ustc.edu.cn>; "jbwang16" <jbwang16@ustc.edu.cn>;  
**Subject:** The change of co-authors about CDDIS-21-4379RR

#### Dear Authors:

Our recent manuscript CDDIS-21-4379RR, entitled "Cytochrome B5 Type A alleviates HCC metastasis via regulating STOML2 related autophagy and promoting sensitivity to Ruxolitinib." has been provisionally accepted for publication in Cell Death & Disease, lists you as a co-author. The author information has changed since the original submission.

In particular, I added Jizhou Wang as a co-author in view of his important contribution to the revision process. And I adjusted the order considering the contributions of all authors.

#### As the author information has changed, I ask for your opinion:

If you **agree** with all the final author information, please reply **I accept all the author information changes**.

If you **disagree** with the final author information or have other suggestions, please email me with details.

The changes of Author List and Contributions are as follows:

#### Final Author List:

Hongrui Guo<sup>1\*</sup>, Shuhang Liang<sup>2\*</sup>, Yan Wang<sup>3\*</sup>, Shuo Zhou<sup>2\*</sup>, Dalong Yin<sup>2\*</sup>, Shugeng Zhang<sup>2</sup>, Jizhou Wang<sup>2</sup>, Dehai Wu<sup>1</sup>, Kun Ma<sup>1</sup>, Yufeng Liu<sup>1</sup>, Linmao Sun<sup>1</sup>, Changyong Ji<sup>2</sup>, Xianying Li<sup>2</sup>, Huanran Zhou<sup>2</sup>, Guangchao Yang<sup>1</sup>, Xinyu Guo<sup>1</sup>, Tianming Cui<sup>2</sup>, Zihao Li<sup>1</sup>, Yao Liu<sup>2+</sup>, Jiabei Wang<sup>2+</sup>, Lianxin Liu<sup>1,4+</sup>

#### Final Author affiliations:

1. Department of Hepatic Surgery, Key Laboratory of Hepatosplenic Surgery, Ministry of Education, The First Affiliated Hospital of Harbin Medical University, Harbin, China

2. Department of Hepatobiliary Surgery, Anhui Province Key Laboratory of Hepatopancreatobiliary Surgery, The First Affiliated Hospital of USTC, Division of Life Sciences and Medicine, University of Science and Technology of China, Hefei, Anhui, 230001, China

3. Department of Colorectal Surgery, Harbin Medical University Cancer Hospital, Harbin, 150001 Heilongjiang, China

4. Lead contact

\* These authors contributed equally to this work.

**Final Author contributions:**

Conceptualization, G.HR., L.SH., L.LX., W.JB., L.Y.; Methodology, Y.DL., W.DH., W.Y., Z.S., W.JZ., Z.SG., M.K., L.ZH.; Software, L.YF., S.LM., J.CY., L.XY., Y.GC.; Validation, G.HR., L.SH., Z.HR., L.ZH., G.XY., C.TM.; Formal Analysis, Z.S., Y.DL., L.LX., W.JB., L.Y.; Investigation, G.HR., L.SH., L.LX., W.JB.; Writing - Original Draft, G.HR., Z.SG.; Writing - Review & Editing, Z.HR., L.LX., W.JB., L.Y.; Visualization, G.HR., L.YF., S.LM., J.CY., L.XY., Y.GC.; Funding Acquisition, W.Y., L.Y., W.JB., L.LX.; Resources, L.LX., W.JB., L.Y.; Supervision, L.LX., W.JB., L.Y..

Thank you very much for your time and consideration. Wish you have a nice day!

**Sincerely yours,**

**Lianxin Liu**

|      |                                                    |                    |
|------|----------------------------------------------------|--------------------|
| 主 题: | 回复: The change of co-authors about CDDIS-21-4379RR |                    |
| 发件人: | "刘雨枫" <413951217@qq.com>                           | 2022-6-27 12:47:27 |
| 收件人: | liulx <liulx@ustc.edu.cn>                          |                    |

Dear Lianxin Liu,

I accept all the author information changes.

Yufeng Liu

-----原始邮件-----

发件人: "liulx" <liulx@ustc.edu.cn>;

发送时间: 2022年6月27日(星期一) 中午11:48

收件人: "郭泓瑞" <hongrui7456@163.com>; "梁书航" <154652031@qq.com>; "wangyan2016md" <wangyan2016md@126.com>; "zhouwill01" <zhouwill01@163.com>; "尹大龙" <dalong48@163.com>; "张树庚" <shugeng517@163.com>; "王继洲" <wangjizhou1984@hotmail.com>; "tianxiadiyi\_12345" <tianxiadiyi\_12345@126.com>; "1694769800" <1694769800@qq.com>; "刘雨枫" <413951217@qq.com>; "lemonzhutou" <lemonzhutou@163.com>; "cyji" <cyji@mail.ustc.edu.cn>; "lidonglps" <lidonglps@qq.com>; "drzhr1026" <drzhr1026@hotmail.com>; "ygc1988" <ygc1988@sina.com>; "1006065333" <1006065333@qq.com>; "1241346394" <1241346394@qq.com>; "1254007965" <1254007965@qq.com>; "刘尧" <liuyao66@ustc.edu.cn>; "jbbwang16" <jbbwang16@ustc.edu.cn>;

主题: The change of co-authors about CDDIS-21-4379RR

## Dear Authors:

Our recent manuscript CDDIS-21-4379RR, entitled "Cytochrome B5 Type A alleviates HCC metastasis via regulating STOML2 related autophagy and promoting sensitivity to Ruxolitinib." has been provisionally accepted for publication in Cell Death & Disease, lists you as a co-author. The author information has changed since the original submission.

In particular, I added Jizhou Wang as a co-author in view of his important contribution to the revision process. And I adjusted the order considering the contributions of all authors.

## As the author information has changed, I ask for your opinion:

If you **agree** with all the final author information, please reply **I accept all the author information changes**.

If you **disagree** with the final author information or have other suggestions, please email me with details.

The changes of Author List and Contributions are as follows:

## Final Author List:

Hongrui Guo<sup>1\*</sup>, Shuhang Liang<sup>2\*</sup>, Yan Wang<sup>3\*</sup>, Shuo Zhou<sup>2\*</sup>, Dalong Yin<sup>2\*</sup>, Shugeng Zhang<sup>2</sup>, Jizhou Wang<sup>2</sup>, Dehai Wu<sup>1</sup>, Kun Ma<sup>1</sup>, Yufeng Liu<sup>1</sup>, Linmao Sun<sup>1</sup>, Changyong Ji<sup>2</sup>, Xianying Li<sup>2</sup>, Huanran Zhou<sup>2</sup>, Guangchao Yang<sup>1</sup>, Xinyu Guo<sup>1</sup>, Tianming Cui<sup>2</sup>, Zihao Li<sup>1</sup>, Yao Liu<sup>2+</sup>, Jiabei Wang<sup>2+</sup>, Lianxin Liu<sup>1,4+</sup>

### **Final Author affiliations:**

1. Department of Hepatic Surgery, Key Laboratory of Hepatosplenic Surgery, Ministry of Education, The First Affiliated Hospital of Harbin Medical University, Harbin, China

2. Department of Hepatobiliary Surgery, Anhui Province Key Laboratory of Hepatopancreatobiliary Surgery, The First Affiliated Hospital of USTC, Division of Life Sciences and Medicine, University of Science and Technology of China, Hefei, Anhui, 230001, China

3. Department of Colorectal Surgery, Harbin Medical University Cancer Hospital, Harbin, 150001 Heilongjiang, China

4. Lead contact

\* These authors contributed equally to this work.

### **Final Author contributions:**

Conceptualization, G.HR., L.SH., L.LX., W.JB., L.Y.; Methodology, Y.DL., W.DH., W.Y., Z.S., W.JZ., Z.SG., M.K., L.ZH.; Software, L.YF., S.LM., J.CY., L.XY., Y.GC.; Validation, G.HR., L.SH., Z.HR., L.ZH., G.XY., C.TM.; Formal Analysis, Z.S., Y.DL., L.LX., W.JB., L.Y.; Investigation, G.HR., L.SH., L.LX., W.JB.; Writing - Original Draft, G.HR., Z.SG.; Writing - Review & Editing, Z.HR., L.LX., W.JB., L.Y.; Visualization, G.HR., L.YF., S.LM., J.CY., L.XY., Y.GC.; Funding Acquisition, W.Y., L.Y., W.JB., L.LX.; Resources, L.LX., W.JB., L.Y.; Supervision, L.LX., W.JB., L.Y..

Thank you very much for your time and consideration. Wish you have a nice day!

**Sincerely yours,**

**Lianxin Liu**

|      |                                                   |                    |
|------|---------------------------------------------------|--------------------|
| 主 题: | Re:The change of co-authors about CDDIS-21-4379RR |                    |
| 发件人: | "孙林茂" <lemonzhutou@163.com>                       | 2022-6-27 16:07:39 |
| 收件人: | liulx@ustc.edu.cn                                 |                    |

Dear Lianxin Liu,

I accept all the author information changes.

Linmao Sun

2022.06.27

At 2022-06-27 11:48:19, [liulx@ustc.edu.cn](mailto:liulx@ustc.edu.cn) wrote:

**Dear Authors :**

Our recent manuscript CDDIS-21-4379RR, entitled "Cytochrome B5 Type A alleviates HCC metastasis via regulating STOML2 related autophagy and promoting sensitivity to Ruxolitinib." has been provisionally accepted for publication in Cell Death & Disease, lists you as a co-author. The author information has changed since the original submission.

In particular, I added Jizhou Wang as a co-author in view of his important contribution to the revision process. And I adjusted the order considering the contributions of all authors.

**As the author information has changed, I ask for your opinion:**

If you **agree** with all the final author information, please reply **I accept all the author information changes.**

If you **disagree** with the final author information or have other suggestions, please email me with details.

The changes of Author List and Contributions are as follows:

**Final Author List:**

Hongrui Guo<sup>1\*</sup>, Shuhang Liang<sup>2\*</sup>, Yan Wang<sup>3\*</sup>, Shuo Zhou<sup>2\*</sup>, Dalong Yin<sup>2\*</sup>, Shugeng Zhang<sup>2</sup>, Jizhou Wang<sup>2</sup>, Dehai Wu<sup>1</sup>, Kun Ma<sup>1</sup>, Yufeng Liu<sup>1</sup>, Linmao Sun<sup>1</sup>, Changyong Ji<sup>2</sup>, Xianying Li<sup>2</sup>, Huanran Zhou<sup>2</sup>, Guangchao Yang<sup>1</sup>, Xinyu Guo<sup>1</sup>, Tianming Cui<sup>2</sup>, Zihao Li<sup>1</sup>, Yao Liu<sup>2+</sup>, Jiabei Wang<sup>2+</sup>, Lianxin Liu<sup>1,4+</sup>

**Final Author affiliations:**

1. Department of Hepatic Surgery, Key Laboratory of Hepatosplenic Surgery, Ministry of Education, The First Affiliated Hospital of Harbin Medical University, Harbin, China

2. Department of Hepatobiliary Surgery, Anhui Province Key Laboratory of Hepatopancreatobiliary Surgery, The First Affiliated Hospital of USTC, Division of Life Sciences and Medicine, University of Science and Technology of China, Hefei, Anhui, 230001, China

3. Department of Colorectal Surgery, Harbin Medical University Cancer Hospital, Harbin, 150001 Heilongjiang, China

4. Lead contact

\* These authors contributed equally to this work.

**Final Author contributions:**

Conceptualization, G.HR., L.SH., L.LX., W.JB., L.Y.; Methodology, Y.DL., W.DH., W.Y., Z.S., W.JZ., Z.SG., M.K., L.ZH.; Software, L.YF., S.LM., J.CY., L.XY., Y.GC.; Validation, G.HR., L.SH, Z.HR., L.ZH., G.XY., C.TM.; Formal Analysis, Z.S., Y.DL., L.LX., W.JB., L.Y.; Investigation, G.HR., L.SH, L.LX., W.JB.; Writing - Original Draft, G.HR., Z.SG.; Writing - Review & Editing, Z.HR., L.LX., W.JB., L.Y.; Visualization, G.HR., L.YF., S.LM., J.CY., L.XY., Y.GC.; Funding Acquisition, W.Y., L.Y., W.JB., L.LX.; Resources, L.LX., W.JB., L.Y.; Supervision, L.LX., W.JB., L.Y..

Thank you very much for your time and consideration. Wish you have a nice day!

**Sincerely yours,**

**Lianxin Liu**



|      |                                                                   |                    |
|------|-------------------------------------------------------------------|--------------------|
| 主 题: | Re: The change of co-authors about CDDIS-21-4379RR - All accepted |                    |
| 发件人: | cyji@mail.ustc.edu.cn                                             | 2022-6-27 13:31:08 |
| 收件人: | liulx@ustc.edu.cn                                                 |                    |

Dear Professor Lianxin Liu,  
I accept all the author information changes.  
Ji Changyong  
2022.06.27

-----原始邮件-----

发件人:liulx@ustc.edu.cn

发送时间:2022-06-27 11:48:19 (星期一)

收件人: "郭泓瑞" <hongrui7456@163.com>, "梁书航" <154652031@qq.com>, wangyan2016md@126.com, zhouwill01@163.com, "尹大龙" <dalong48@163.com>, "张树庚" <shugeng517@163.com>, "王继洲" <wangjizhou1984@hotmail.com>, tianxiadiyi\_12345@126.com, 1694769800@qq.com, 413951217 <413951217@qq.com>, lemonzhutou@163.com, cyji@mail.ustc.edu.cn, lidonglps@qq.com, drzhr1026@hotmail.com, ygc1988@sina.com, 1006065333@qq.com, 1241346394 <1241346394@qq.com>, 1254007965@qq.com, "刘尧" <liuyao66@ustc.edu.cn>, jbwang16 <jbwang16@ustc.edu.cn>

抄送:

主题: The change of co-authors about CDDIS-21-4379RR

### Dear Authors :

Our recent manuscript CDDIS-21-4379RR, entitled "Cytochrome B5 Type A alleviates HCC metastasis via regulating STOML2 related autophagy and promoting sensitivity to Ruxolitinib." has been provisionally accepted for publication in Cell Death & Disease, lists you as a co-author. The author information has changed since the original submission.

In particular, I added Jizhou Wang as a co-author in view of his important contribution to the revision process. And I adjusted the order considering the contributions of all authors.

### As the author information has changed, I ask for your opinion:

If you **agree** with all the final author information, please reply **I accept all the author information changes**.

If you **disagree** with the final author information or have other suggestions, please email me with details.

The changes of Author List and Contributions are as follows:

### Final Author List:

Hongrui Guo<sup>1\*</sup>, Shuhang Liang<sup>2\*</sup>, Yan Wang<sup>3\*</sup>, Shuo Zhou<sup>2\*</sup>, Dalong Yin<sup>2\*</sup>, Shugeng Zhang<sup>2</sup>, Jizhou Wang<sup>2</sup>, Dehai Wu<sup>1</sup>, Kun Ma<sup>1</sup>, Yufeng Liu<sup>1</sup>, Linmao Sun<sup>1</sup>, Changyong Ji<sup>2</sup>, Xianying Li<sup>2</sup>, Huanran Zhou<sup>2</sup>, Guangchao Yang<sup>1</sup>, Xinyu Guo<sup>1</sup>, Tianming Cui<sup>2</sup>, Zihao Li<sup>1</sup>, Yao Liu<sup>2+</sup>, Jiabei Wang<sup>2+</sup>, Lianxin Liu<sup>1,4+</sup>

### Final Author affiliations:

1.Department of Hepatic Surgery, Key Laboratory of Hepatosplenic Surgery, Ministry of Education, The First Affiliated Hospital of Harbin Medical University, Harbin, China

2.Department of Hepatobiliary Surgery, Anhui Province Key Laboratory of Hepatopancreatobiliary Surgery, The First Affiliated Hospital of USTC, Division of Life Sciences and Medicine, University of Science and Technology of China, Hefei, Anhui, 230001, China

3.Department of Colorectal Surgery, Harbin Medical University Cancer Hospital, Harbin, 150001 Heilongjiang, China

4. Lead contact

\* These authors contributed equally to this work.

#### **Final Author contributions:**

Conceptualization, G.HR., L.SH., L.LX., W.JB., L.Y.; Methodology, Y.DL., W.DH., W.Y., Z.S., W.JZ., Z.SG., M.K., L.ZH.; Software, L.YF., S.LM., J.CY., L.XY., Y.GC.; Validation, G.HR., L.SH, Z.HR., L.ZH., G.XY., C.TM.; Formal Analysis, Z.S.,Y.DL.,L.LX., W.JB., L.Y.; Investigation, G.HR., L.SH, L.LX., W.JB.; Writing - Original Draft, G.HR., Z.SG.; Writing - Review & Editing, Z.HR., L.LX., W.JB., L.Y.; Visualization, G.HR., L.YF., S.LM., J.CY., L.XY., Y.GC.; Funding Acquisition, W.Y., L.Y., W.JB., L.LX.; Resources, L.LX., W.JB., L.Y.; Supervision, L.LX., W.JB., L.Y..

Thank you very much for your time and consideration. Wish you have a nice day!

**Sincerely yours,**

**Lianxin Liu**

|      |                                                    |                    |
|------|----------------------------------------------------|--------------------|
| 主 题: | 回复: The change of co-authors about CDDIS-21-4379RR |                    |
| 发件人: | "Ace、" <lidonglps@qq.com>                          | 2022-6-27 12:49:59 |
| 收件人: | liulx <liulx@ustc.edu.cn>                          |                    |

Dear Professor Liu  
I accept all the author information changes.  
Sincerely yours,  
Xianying Li

----- 原始邮件 -----

**发件人:** "liulx" <liulx@ustc.edu.cn>;  
**发送时间:** 2022年6月27日(星期一) 中午11:48  
**收件人:** "郭泓瑞" <hongrui7456@163.com>; "梁书航" <154652031@qq.com>; "wangyan2016md" <wangyan2016md@126.com>; "zhouwill01" <zhouwill01@163.com>; "尹大龙" <dalong48@163.com>; "张树庚" <shugeng517@163.com>; "王继洲" <wangjizhou1984@hotmail.com>; "tianxiadiyi\_12345" <tianxiadiyi\_12345@126.com>; "1694769800" <1694769800@qq.com>; "413951217" <413951217@qq.com>; "lemonzhutou" <lemonzhutou@163.com>; "cyji" <cyji@mail.ustc.edu.cn>; "Ace、" <lidonglps@qq.com>; "drzhr1026" <drzhr1026@hotmail.com>; "ygc1988" <ygc1988@sina.com>; "1006065333" <1006065333@qq.com>; "1241346394" <1241346394@qq.com>; "1254007965" <1254007965@qq.com>; "刘尧" <liuyao66@ustc.edu.cn>; "jbwang16" <jbwang16@ustc.edu.cn>;  
**主题:** The change of co-authors about CDDIS-21-4379RR

## Dear Authors:

Our recent manuscript CDDIS-21-4379RR, entitled "Cytochrome B5 Type A alleviates HCC metastasis via regulating STOML2 related autophagy and promoting sensitivity to Ruxolitinib." has been provisionally accepted for publication in Cell Death & Disease, lists you as a co-author. The author information has changed since the original submission.

In particular, I added Jizhou Wang as a co-author in view of his important contribution to the revision process. And I adjusted the order considering the contributions of all authors.

## As the author information has changed, I ask for your opinion:

If you **agree** with all the final author information, please reply **I accept all the author information changes**.

If you **disagree** with the final author information or have other suggestions, please email me with details.

The changes of Author List and Contributions are as follows:

## Final Author List:

Hongrui Guo<sup>1\*</sup>, Shuhang Liang<sup>2\*</sup>, Yan Wang<sup>3\*</sup>, Shuo Zhou<sup>2\*</sup>, Dalong Yin<sup>2\*</sup>, Shugeng Zhang<sup>2</sup>, Jizhou Wang<sup>2</sup>, Dehai Wu<sup>1</sup>, Kun Ma<sup>1</sup>, Yufeng Liu<sup>1</sup>, Linmao Sun<sup>1</sup>, Changyong Ji<sup>2</sup>, Xianying Li<sup>2</sup>, Huanran Zhou<sup>2</sup>, Guangchao Yang<sup>1</sup>, Xinyu Guo<sup>1</sup>, Tianming Cui<sup>2</sup>, Zihao Li<sup>1</sup>, Yao Liu<sup>2+</sup>, Jiabei Wang<sup>2+</sup>, Lianxin Liu<sup>1,4+</sup>

## Final Author affiliations:

1. Department of Hepatic Surgery, Key Laboratory of Hepatosplenic Surgery, Ministry of Education, The First Affiliated Hospital of Harbin Medical University, Harbin, China

2. Department of Hepatobiliary Surgery, Anhui Province Key Laboratory of Hepatopancreatobiliary Surgery, The First Affiliated Hospital of USTC, Division of Life Sciences and Medicine, University of Science and Technology of China, Hefei, Anhui, 230001, China

3. Department of Colorectal Surgery, Harbin Medical University Cancer Hospital, Harbin, 150001 Heilongjiang, China

4. Lead contact

\* These authors contributed equally to this work.

#### **Final Author contributions:**

Conceptualization, G.HR., L.SH., L.LX., W.JB., L.Y.; Methodology, Y.DL., W.DH., W.Y., Z.S., W.JZ., Z.SG., M.K., L.ZH.; Software, L.YF., S.LM., J.CY., L.XY., Y.GC.; Validation, G.HR., L.SH., Z.HR., L.ZH., G.XY., C.TM.; Formal Analysis, Z.S., Y.DL., L.LX., W.JB., L.Y.; Investigation, G.HR., L.SH., L.LX., W.JB.; Writing - Original Draft, G.HR., Z.SG.; Writing - Review & Editing, Z.HR., L.LX., W.JB., L.Y.; Visualization, G.HR., L.YF., S.LM., J.CY., L.XY., Y.GC.; Funding Acquisition, W.Y., L.Y., W.JB., L.LX.; Resources, L.LX., W.JB., L.Y.; Supervision, L.LX., W.JB., L.Y.

Thank you very much for your time and consideration. Wish you have a nice day!

**Sincerely yours,**

**Lianxin Liu**

|      |                                                    |                    |
|------|----------------------------------------------------|--------------------|
| 主 题: | 回复: The change of co-authors about CDDIS-21-4379RR |                    |
| 发件人: | "周 焕然" <drzhr1026@hotmail.com>                     | 2022-6-27 15:22:17 |
| 收件人: | "liulx@ustc.edu.cn" <liulx@ustc.edu.cn>            |                    |

Dear Professor Lianxin Liu,

I accept all the author information changes.

Best wishes,

Huanran Zhou

---

**发件人:** liulx@ustc.edu.cn <liulx@ustc.edu.cn>

**发送时间:** 2022年6月27日 11:48

**收件人:** 郭泓瑞 <hongrui7456@163.com>; 梁书航 <154652031@qq.com>; wangyan2016md@126.com <wangyan2016md@126.com>; zhouwill01@163.com <zhouwill01@163.com>; 尹大龙 <dalong48@163.com>; 张树庚 <shugeng517@163.com>; 王继洲 <wangjizhou1984@hotmail.com>; tianxiadiyi\_12345@126.com <tianxiadiyi\_12345@126.com>; 1694769800@qq.com <1694769800@qq.com>; 413951217 <413951217@qq.com>; lemonzhutou@163.com <lemonzhutou@163.com>; cyji@mail.ustc.edu.cn <cyji@mail.ustc.edu.cn>; lidonglps@qq.com <lidonglps@qq.com>; drzhr1026@hotmail.com <drzhr1026@hotmail.com>; ygc1988@sina.com <ygc1988@sina.com>; 1006065333@qq.com <1006065333@qq.com>; 1241346394 <1241346394@qq.com>; 1254007965@qq.com <1254007965@qq.com>; 刘尧 <liuyao66@ustc.edu.cn>; jbwang16 <jbwang16@ustc.edu.cn>

**主题:** The change of co-authors about CDDIS-21-4379RR

#### **Dear Authors:**

Our recent manuscript CDDIS-21-4379RR, entitled "Cytochrome B5 Type A alleviates HCC metastasis via regulating STOML2 related autophagy and promoting sensitivity to Ruxolitinib." has been provisionally accepted for publication in Cell Death & Disease, lists you as a co-author. The author information has changed since the original submission.

In particular, I added Jizhou Wang as a co-author in view of his important contribution to the revision process. And I adjusted the order considering the contributions of all authors.

#### **As the author information has changed, I ask for your opinion:**

If you **agree** with all the final author information, please reply **I accept all the author information changes**.

If you **disagree** with the final author information or have other suggestions, please email me with details.

The changes of Author List and Contributions are as follows:

#### **Final Author List:**

Hongrui Guo<sup>1\*</sup>, Shuhang Liang<sup>2\*</sup>, Yan Wang<sup>3\*</sup>, Shuo Zhou<sup>2\*</sup>, Dalong Yin<sup>2\*</sup>, Shugeng Zhang<sup>2</sup>, Jizhou Wang<sup>2</sup>, Dehai Wu<sup>1</sup>, Kun Ma<sup>1</sup>, Yufeng Liu<sup>1</sup>, Linmao Sun<sup>1</sup>, Changyong Ji<sup>2</sup>, Xianying Li<sup>2</sup>, Huanran Zhou<sup>2</sup>, Guangchao Yang<sup>1</sup>, Xinyu Guo<sup>1</sup>, Tianming Cui<sup>2</sup>, Zihao Li<sup>1</sup>, Yao Liu<sup>2+</sup>, Jiabei Wang<sup>2+</sup>, Lianxin Liu<sup>1,4+</sup>

#### **Final Author affiliations:**

- 1.Department of Hepatic Surgery, Key Laboratory of Hepatosplenic Surgery, Ministry of Education, The First Affiliated Hospital of Harbin Medical University, Harbin, China
- 2.Department of Hepatobiliary Surgery, Anhui Province Key Laboratory of Hepatopancreatobiliary Surgery, The First Affiliated Hospital of USTC, Division of Life Sciences and Medicine, University of Science and Technology of China, Hefei, Anhui, 230001, China
- 3.Department of Colorectal Surgery, Harbin Medical University Cancer Hospital, Harbin, 150001 Heilongjiang, China

4. Lead contact

\* These authors contributed equally to this work.

**Final Author contributions:**

Conceptualization, G.HR., L.SH., L.LX., W.JB., L.Y.; Methodology, Y.DL., W.DH., W.Y., Z.S., W.JZ., Z.SG., M.K., L.ZH.; Software, L.YF., S.LM., J.CY., L.XY., Y.GC.; Validation, G.HR., L.SH, Z.HR., L.ZH., G.XY., C.TM.; Formal Analysis, Z.S., Y.DL., L.LX., W.JB., L.Y.; Investigation, G.HR., L.SH, L.LX., W.JB.; Writing - Original Draft, G.HR., Z.SG.; Writing - Review & Editing, Z.HR., L.LX., W.JB., L.Y.; Visualization, G.HR., L.YF., S.LM., J.CY., L.XY., Y.GC.; Funding Acquisition, W.Y., L.Y., W.JB., L.LX.; Resources, L.LX., W.JB., L.Y.; Supervision, L.LX., W.JB., L.Y..

Thank you very much for your time and consideration. Wish you have a nice day!

**Sincerely yours,**  
**Lianxin Liu**

|      |                                                    |                    |
|------|----------------------------------------------------|--------------------|
| 主 题: | 回复: The change of co-authors about CDDIS-21-4379RR |                    |
| 发件人: | ygc1988@sina.com                                   | 2022-6-27 20:45:41 |
| 收件人: | liulx <liulx@ustc.edu.cn>                          |                    |

Dear Professor Lianxin Liu,  
I accept all the author information changes.

Guangchao Yang

----- 原始邮件 -----

发件人: liulx@ustc.edu.cn

收件人: 郭泓瑞 <hongrui7456@163.com>, 梁书航 <154652031@qq.com>, wangyan2016md@126.com, zhouwill01@163.com, 尹大龙 <dalong48@163.com>, 张树庚 <shugeng517@163.com>, 王继洲 <wangjizhou1984@hotmail.com>, tianxiadiyi\_12345@126.com, 1694769800@qq.com, 413951217 <413951217@qq.com>, lemonzhutou@163.com, cyji@mail.ustc.edu.cn, lidonglps@qq.com, drzhr1026@hotmail.com, ygc1988@sina.com, 1006065333@qq.com, 1241346394 <1241346394@qq.com>, 1254007965@qq.com, 刘尧 <liuyao66@ustc.edu.cn>, jbwang16 <jbwang16@ustc.edu.cn>

主题: The change of co-authors about CDDIS-21-4379RR

日期: 2022年06月27日 11点48分

### Dear Authors:

Our recent manuscript CDDIS-21-4379RR, entitled "Cytochrome B5 Type A alleviates HCC metastasis via regulating STOML2 related autophagy and promoting sensitivity to Ruxolitinib." has been provisionally accepted for publication in Cell Death & Disease, lists you as a co-author. The author information has changed since the original submission.

In particular, I added Jizhou Wang as a co-author in view of his important contribution to the revision process. And I adjusted the order considering the contributions of all authors.

### As the author information has changed, I ask for your opinion:

If you **agree** with all the final author information, please reply **I accept all the author information changes**.

If you **disagree** with the final author information or have other suggestions, please email me with details.

The changes of Author List and Contributions are as follows:

### Final Author List:

Hongrui Guo<sup>1\*</sup>, Shuhang Liang<sup>2\*</sup>, Yan Wang<sup>3\*</sup>, Shuo Zhou<sup>2\*</sup>, Dalong Yin<sup>2\*</sup>, Shugeng Zhang<sup>2</sup>, Jizhou Wang<sup>2</sup>, Dehai Wu<sup>1</sup>, Kun Ma<sup>1</sup>, Yufeng Liu<sup>1</sup>, Linmao Sun<sup>1</sup>, Changyong Ji<sup>2</sup>, Xianying Li<sup>2</sup>, Huanran Zhou<sup>2</sup>, Guangchao Yang<sup>1</sup>, Xinyu Guo<sup>1</sup>, Tianming Cui<sup>2</sup>, Zihao Li<sup>1</sup>, Yao Liu<sup>2+</sup>, Jiabei Wang<sup>2+</sup>, Lianxin Liu<sup>1,4+</sup>

### Final Author affiliations:

1. Department of Hepatic Surgery, Key Laboratory of Hepatosplenic Surgery, Ministry of Education, The First Affiliated Hospital of Harbin Medical University, Harbin, China

2. Department of Hepatobiliary Surgery, Anhui Province Key Laboratory of Hepatopancreatobiliary Surgery, The First Affiliated Hospital of USTC, Division of Life Sciences and Medicine, University of

Science and Technology of China, Hefei, Anhui, 230001, China

3.Department of Colorectal Surgery, Harbin Medical University Cancer Hospital, Harbin, 150001 Heilongjiang, China

4. Lead contact

\* These authors contributed equally to this work.

**Final Author contributions:**

Conceptualization, G.HR., L.SH., L.LX., W.JB., L.Y.; Methodology, Y.DL., W.DH., W.Y., Z.S., W.JZ., Z.SG., M.K., L.ZH.; Software, L.YF., S.LM., J.CY., L.XY., Y.GC.; Validation, G.HR., L.SH, Z.HR., L.ZH., G.XY., C.TM.; Formal Analysis, Z.S., Y.DL., L.LX., W.JB., L.Y.; Investigation, G.HR., L.SH, L.LX., W.JB.; Writing - Original Draft, G.HR., Z.SG.; Writing - Review & Editing, Z.HR., L.LX., W.JB., L.Y.; Visualization, G.HR., L.YF., S.LM., J.CY., L.XY., Y.GC.; Funding Acquisition, W.Y., L.Y., W.JB., L.LX.; Resources, L.LX., W.JB., L.Y.; Supervision, L.LX., W.JB., L.Y..

Thank you very much for your time and consideration. Wish you have a nice day!

**Sincerely yours,**

**Lianxin Liu**



|      |                                                    |                    |
|------|----------------------------------------------------|--------------------|
| 主 题: | 回复: The change of co-authors about CDDIS-21-4379RR |                    |
| 发件人: | "郭新宇" <1006065333@qq.com>                          | 2022-6-27 13:05:33 |
| 收件人: | liulx <liulx@ustc.edu.cn>                          |                    |

**Dear Professor Liu:**

**I accept all the author information changes.**

**Best wishes.**

**Guo Xinyu**

----- 原始邮件 -----

**发件人:** "liulx" <liulx@ustc.edu.cn>;

**发送时间:** 2022年6月27日(星期一) 中午11:48

**收件人:** "郭泓瑞" <hongrui7456@163.com>; "梁书航" <154652031@qq.com>; "wangyan2016md" <wangyan2016md@126.com>; "zhouwill01" <zhouwill01@163.com>; "尹大龙" <dalong48@163.com>; "张树庚" <shugeng517@163.com>; "王继洲" <wangjizhou1984@hotmail.com>; "tianxiadiyi\_12345" <tianxiadiyi\_12345@126.com>; "1694769800" <1694769800@qq.com>; "413951217" <413951217@qq.com>; "lemonzhutou" <lemonzhutou@163.com>; "cyji" <cyji@mail.ustc.edu.cn>; "lidonglps" <lidonglps@qq.com>; "drzhr1026" <drzhr1026@hotmail.com>; "ygc1988" <ygc1988@sina.com>; "郭新宇" <1006065333@qq.com>; "1241346394" <1241346394@qq.com>; "1254007965" <1254007965@qq.com>; "刘尧" <liuyao66@ustc.edu.cn>; "jbbwang16" <jbbwang16@ustc.edu.cn>;

**主题:** The change of co-authors about CDDIS-21-4379RR

**Dear Authors:**

Our recent manuscript CDDIS-21-4379RR, entitled "Cytochrome B5 Type A alleviates HCC metastasis via regulating STOML2 related autophagy and promoting sensitivity to Ruxolitinib." has been provisionally accepted for publication in Cell Death & Disease, lists you as a co-author. The author information has changed since the original submission.

In particular, I added Jizhou Wang as a co-author in view of his important contribution to the revision process. And I adjusted the order considering the contributions of all authors.

**As the author information has changed, I ask for your opinion:**

If you **agree** with all the final author information, please reply **I accept all the author information changes**.

If you **disagree** with the final author information or have other suggestions, please email me with details.

The changes of Author List and Contributions are as follows:

**Final Author List:**

Hongrui Guo<sup>1\*</sup>, Shuhang Liang<sup>2\*</sup>, Yan Wang<sup>3\*</sup>, Shuo Zhou<sup>2\*</sup>, Dalong Yin<sup>2\*</sup>, Shugeng Zhang<sup>2</sup>, Jizhou Wang<sup>2</sup>, Dehai Wu<sup>1</sup>, Kun Ma<sup>1</sup>, Yufeng Liu<sup>1</sup>, Linmao Sun<sup>1</sup>, Changyong Ji<sup>2</sup>, Xianying Li<sup>2</sup>,

Huanran Zhou<sup>2</sup>, Guangchao Yang<sup>1</sup>, Xinyu Guo<sup>1</sup>, Tianming Cui<sup>2</sup>, Zihao Li<sup>1</sup>, Yao Liu<sup>2+</sup>, Jiabei Wang<sup>2+</sup>, Lianxin Liu<sup>1,4+</sup>

### **Final Author affiliations:**

1.Department of Hepatic Surgery, Key Laboratory of Hepatosplenic Surgery, Ministry of Education, The First Affiliated Hospital of Harbin Medical University, Harbin, China

2.Department of Hepatobiliary Surgery, Anhui Province Key Laboratory of Hepatopancreatobiliary Surgery, The First Affiliated Hospital of USTC, Division of Life Sciences and Medicine, University of Science and Technology of China, Hefei, Anhui, 230001, China

3.Department of Colorectal Surgery, Harbin Medical University Cancer Hospital, Harbin, 150001 Heilongjiang, China

4. Lead contact

\* These authors contributed equally to this work.

### **Final Author contributions:**

Conceptualization, G.HR., L.SH., L.LX., W.JB., L.Y.; Methodology, Y.DL., W.DH., W.Y., Z.S., W.JZ., Z.SG., M.K., L.ZH.; Software, L.YF., S.LM., J.CY., L.XY., Y.GC.; Validation, G.HR., L.SH, Z.HR., L.ZH., G.XY., C.TM.; Formal Analysis, Z.S.,Y.DL.,L.LX., W.JB., L.Y.; Investigation, G.HR., L.SH, L.LX., W.JB.; Writing - Original Draft, G.HR., Z.SG.; Writing - Review & Editing, Z.HR., L.LX., W.JB., L.Y.; Visualization, G.HR., L.YF., S.LM., J.CY., L.XY., Y.GC.; Funding Acquisition, W.Y., L.Y., W.JB., L.LX.; Resources, L.LX., W.JB., L.Y.; Supervision, L.LX., W.JB., L.Y..

Thank you very much for your time and consideration. Wish you have a nice day!

**Sincerely yours,**

**Lianxin Liu**

|      |                                                    |                    |
|------|----------------------------------------------------|--------------------|
| 主 题: | 回复: The change of co-authors about CDDIS-21-4379RR |                    |
| 发件人: | "传说中的小铭" <1241346394@qq.com>                       | 2022-6-27 13:17:41 |
| 收件人: | liulx <liulx@ustc.edu.cn>                          |                    |

Dear Professor Lianxin Liu,  
I accept all the author information changes.

Tianming Cui

----- 原始邮件 -----

**发件人:** "liulx" <liulx@ustc.edu.cn>;  
**发送时间:** 2022年6月27日(星期一) 中午11:48  
**收件人:** "郭泓瑞" <hongrui7456@163.com>; "梁书航" <154652031@qq.com>; "wangyan2016md" <wangyan2016md@126.com>; "zhouwill01" <zhouwill01@163.com>; "尹大龙" <dalong48@163.com>; "张树庚" <shugeng517@163.com>; "王继洲" <wangjizhou1984@hotmail.com>; "tianxiadiyi\_12345" <tianxiadiyi\_12345@126.com>; "1694769800" <1694769800@qq.com>; "413951217" <413951217@qq.com>; "lemonzhutou" <lemonzhutou@163.com>; "cyji" <cyji@mail.ustc.edu.cn>; "lidonglps" <lidonglps@qq.com>; "drzhr1026" <drzhr1026@hotmail.com>; "ygc1988" <ygc1988@sina.com>; "1006065333" <1006065333@qq.com>; "传说中的小铭" <1241346394@qq.com>; "1254007965" <1254007965@qq.com>; "刘尧" <liuyao66@ustc.edu.cn>; "jbwang16" <jbwang16@ustc.edu.cn>;  
**主题:** The change of co-authors about CDDIS-21-4379RR

## Dear Authors:

Our recent manuscript CDDIS-21-4379RR, entitled "Cytochrome B5 Type A alleviates HCC metastasis via regulating STOML2 related autophagy and promoting sensitivity to Ruxolitinib." has been provisionally accepted for publication in Cell Death & Disease, lists you as a co-author. The author information has changed since the original submission.

In particular, I added Jizhou Wang as a co-author in view of his important contribution to the revision process. And I adjusted the order considering the contributions of all authors.

## As the author information has changed, I ask for your opinion:

If you **agree** with all the final author information, please reply **I accept all the author information changes**.

If you **disagree** with the final author information or have other suggestions, please email me with details.

The changes of Author List and Contributions are as follows:

## Final Author List:

Hongrui Guo<sup>1\*</sup>, Shuhang Liang<sup>2\*</sup>, Yan Wang<sup>3\*</sup>, Shuo Zhou<sup>2\*</sup>, Dalong Yin<sup>2\*</sup>, Shugeng Zhang<sup>2</sup>, Jizhou Wang<sup>2</sup>, Dehai Wu<sup>1</sup>, Kun Ma<sup>1</sup>, Yufeng Liu<sup>1</sup>, Linmao Sun<sup>1</sup>, Changyong Ji<sup>2</sup>, Xianying Li<sup>2</sup>, Huanran Zhou<sup>2</sup>, Guangchao Yang<sup>1</sup>, Xinyu Guo<sup>1</sup>, Tianming Cui<sup>2</sup>, Zihao Li<sup>1</sup>, Yao Liu<sup>2+</sup>, Jiabei Wang<sup>2+</sup>, Lianxin Liu<sup>1,4+</sup>

### **Final Author affiliations:**

1. Department of Hepatic Surgery, Key Laboratory of Hepatosplenic Surgery, Ministry of Education, The First Affiliated Hospital of Harbin Medical University, Harbin, China

2. Department of Hepatobiliary Surgery, Anhui Province Key Laboratory of Hepatopancreatobiliary Surgery, The First Affiliated Hospital of USTC, Division of Life Sciences and Medicine, University of Science and Technology of China, Hefei, Anhui, 230001, China

3. Department of Colorectal Surgery, Harbin Medical University Cancer Hospital, Harbin, 150001 Heilongjiang, China

4. Lead contact

\* These authors contributed equally to this work.

### **Final Author contributions:**

Conceptualization, G.HR., L.SH., L.LX., W.JB., L.Y.; Methodology, Y.DL., W.DH., W.Y., Z.S., W.JZ., Z.SG., M.K., L.ZH.; Software, L.YF., S.LM., J.CY., L.XY., Y.GC.; Validation, G.HR., L.SH., Z.HR., L.ZH., G.XY., C.TM.; Formal Analysis, Z.S., Y.DL., L.LX., W.JB., L.Y.; Investigation, G.HR., L.SH., L.LX., W.JB.; Writing - Original Draft, G.HR., Z.SG.; Writing - Review & Editing, Z.HR., L.LX., W.JB., L.Y.; Visualization, G.HR., L.YF., S.LM., J.CY., L.XY., Y.GC.; Funding Acquisition, W.Y., L.Y., W.JB., L.LX.; Resources, L.LX., W.JB., L.Y.; Supervision, L.LX., W.JB., L.Y..

Thank you very much for your time and consideration. Wish you have a nice day!

**Sincerely yours,**

**Lianxin Liu**

|      |                                                |                    |
|------|------------------------------------------------|--------------------|
| 主 题: | The change of co-authors about CDDIS-21-4379RR |                    |
| 发件人: | "李梓豪" <1254007965@qq.com>                      | 2022-6-27 13:16:27 |
| 收件人: | liulx <liulx@ustc.edu.cn>                      |                    |

Dear Professor Lianxin Liu, I accept all the author information changes. zihao Li

---原始邮件---

发件人: liulx"

发送时间: "2022/6/27 11:48:21"

收件人: "郭泓瑞", "梁书航" <154652031@qq.com>, "wangyan2016md", "zhouwill01", "尹大龙", "张树庚", "王继洲", "tianxiadiyi\_12345", "1694769800" <1694769800@qq.com>, "413951217" <413951217@qq.com>, "lemonzhutou", "cyji", "lidonglps", "drzhr1026", "ygc1988", "1006065333" <1006065333@qq.com>, "1241346394" <1241346394@qq.com>, "1254007965" <1254007965@qq.com>, "刘尧", "jbwang16"

主题: The change of co-authors about CDDIS-21-4379RR

## Dear Authors:

Our recent manuscript CDDIS-21-4379RR, entitled "Cytochrome B5 Type A alleviates HCC metastasis via regulating STOML2 related autophagy and promoting sensitivity to Ruxolitinib." has been provisionally accepted for publication in Cell Death & Disease, lists you as a co-author. The author information has changed since the original submission.

In particular, I added Jizhou Wang as a co-author in view of his important contribution to the revision process. And I adjusted the order considering the contributions of all authors.

## As the author information has changed, I ask for your opinion:

If you **agree** with all the final author information, please reply **I accept all the author information changes**.

If you **disagree** with the final author information or have other suggestions, please email me with details.

The changes of Author List and Contributions are as follows:

## Final Author List:

Hongrui Guo<sup>1\*</sup>, Shuhang Liang<sup>2\*</sup>, Yan Wang<sup>3\*</sup>, Shuo Zhou<sup>2\*</sup>, Dalong Yin<sup>2\*</sup>, Shugeng Zhang<sup>2</sup>, Jizhou Wang<sup>2</sup>, Dehai Wu<sup>1</sup>, Kun Ma<sup>1</sup>, Yufeng Liu<sup>1</sup>, Linmao Sun<sup>1</sup>, Changyong Ji<sup>2</sup>, Xianying Li<sup>2</sup>, Huanran Zhou<sup>2</sup>, Guangchao Yang<sup>1</sup>, Xinyu Guo<sup>1</sup>, Tianming Cui<sup>2</sup>, Zihao Li<sup>1</sup>, Yao Liu<sup>2+</sup>, Jiabei Wang<sup>2+</sup>, Lianxin Liu<sup>1,4+</sup>

**Final Author affiliations:**

1.Department of Hepatic Surgery, Key Laboratory of Hepatosplenic Surgery, Ministry of Education, The First Affiliated Hospital of Harbin Medical University, Harbin, China

2.Department of Hepatobiliary Surgery, Anhui Province Key Laboratory of Hepatopancreatobiliary Surgery, The First Affiliated Hospital of USTC, Division of Life Sciences and Medicine, University of Science and Technology of China, Hefei, Anhui, 230001, China

3.Department of Colorectal Surgery, Harbin Medical University Cancer Hospital, Harbin, 150001 Heilongjiang, China

4. Lead contact

\* These authors contributed equally to this work.

**Final Author contributions:**

Conceptualization, G.HR., L.SH., L.LX., W.JB., L.Y.; Methodology, Y.DL., W.DH., W.Y., Z.S., W.JZ., Z.SG., M.K., L.ZH.; Software, L.YF., S.LM., J.CY., L.XY., Y.GC.; Validation, G.HR., L.SH, Z.HR., L.ZH., G.XY., C.TM.; Formal Analysis, Z.S.,Y.DL.,L.LX., W.JB., L.Y.; Investigation, G.HR., L.SH, L.LX., W.JB.; Writing - Original Draft, G.HR., Z.SG.; Writing - Review & Editing, Z.HR., L.LX., W.JB., L.Y.; Visualization, G.HR., L.YF., S.LM., J.CY., L.XY., Y.GC.; Funding Acquisition, W.Y., L.Y., W.JB., L.LX.; Resources, L.LX., W.JB., L.Y.; Supervision, L.LX., W.JB., L.Y..

Thank you very much for your time and consideration. Wish you have a nice day!

**Sincerely yours,**

**Lianxin Liu**

|      |                                                    |                    |
|------|----------------------------------------------------|--------------------|
| 主 题: | Re: The change of co-authors about CDDIS-21-4379RR |                    |
| 发件人: | "刘尧" <liuyao66@ustc.edu.cn>                        | 2022-6-27 12:38:32 |
| 收件人: | liulx@ustc.edu.cn                                  |                    |

Dear Prof. Lianxin Liu,

Congratulations! I accept all the author information changes.

Yao Liu

-----原始邮件-----

发件人:liulx@ustc.edu.cn

发送时间:2022-06-27 11:48:19 (星期一)

收件人: "郭泓瑞" <hongrui7456@163.com>, "梁书航" <154652031@qq.com>, wangyan2016md@126.com, zhouwill01@163.com, "尹大龙" <dalong48@163.com>, "张树庚" <shugeng517@163.com>, "王继洲" <wangjizhou1984@hotmail.com>, tianxiadiyi\_12345@126.com, 1694769800@qq.com, 413951217 <413951217@qq.com>, lemonzhutou@163.com, cyji@mail.ustc.edu.cn, lidonglps@qq.com, drzhr1026@hotmail.com, ygc1988@sina.com, 1006065333@qq.com, 1241346394 <1241346394@qq.com>, 1254007965@qq.com, "刘尧" <liuyao66@ustc.edu.cn>, jbwang16 <jbwang16@ustc.edu.cn>

抄送:

主题: The change of co-authors about CDDIS-21-4379RR

### Dear Authors:

Our recent manuscript CDDIS-21-4379RR, entitled "Cytochrome B5 Type A alleviates HCC metastasis via regulating STOML2 related autophagy and promoting sensitivity to Ruxolitinib." has been provisionally accepted for publication in Cell Death & Disease, lists you as a co-author. The author information has changed since the original submission.

In particular, I added Jizhou Wang as a co-author in view of his important contribution to the revision process. And I adjusted the order considering the contributions of all authors.

### As the author information has changed, I ask for your opinion:

If you **agree** with all the final author information, please reply **I accept all the author information changes**.

If you **disagree** with the final author information or have other suggestions, please email me with details.

The changes of Author List and Contributions are as follows:

### Final Author List:

Hongrui Guo<sup>1\*</sup>, Shuhang Liang<sup>2\*</sup>, Yan Wang<sup>3\*</sup>, Shuo Zhou<sup>2\*</sup>, Dalong Yin<sup>2\*</sup>, Shugeng Zhang<sup>2</sup>, Jizhou Wang<sup>2</sup>, Dehai Wu<sup>1</sup>, Kun Ma<sup>1</sup>, Yufeng Liu<sup>1</sup>, Linmao Sun<sup>1</sup>, Changyong Ji<sup>2</sup>, Xianying Li<sup>2</sup>, Huanran Zhou<sup>2</sup>, Guangchao Yang<sup>1</sup>, Xinyu Guo<sup>1</sup>, Tianming Cui<sup>2</sup>, Zihao Li<sup>1</sup>, Yao Liu<sup>2+</sup>, Jiabei Wang<sup>2+</sup>, Lianxin Liu<sup>1,4+</sup>

### Final Author affiliations:

1. Department of Hepatic Surgery, Key Laboratory of Hepatosplenic Surgery, Ministry of Education, The First Affiliated Hospital of Harbin Medical University, Harbin, China

2. Department of Hepatobiliary Surgery, Anhui Province Key Laboratory of Hepatopancreatobiliary Surgery, The First Affiliated Hospital of USTC, Division of Life Sciences and Medicine, University of Science and Technology of China, Hefei, Anhui, 230001, China

3. Department of Colorectal Surgery, Harbin Medical University Cancer Hospital, Harbin, 150001 Heilongjiang, China

4. Lead contact

\* These authors contributed equally to this work.

#### **Final Author contributions:**

Conceptualization, G.HR., L.SH., L.LX., W.JB., L.Y.; Methodology, Y.DL., W.DH., W.Y., Z.S., W.JZ., Z.SG., M.K., L.ZH.; Software, L.YF., S.LM., J.CY., L.XY., Y.GC.; Validation, G.HR., L.SH, Z.HR., L.ZH., G.XY., C.TM.; Formal Analysis, Z.S., Y.DL., L.LX., W.JB., L.Y.; Investigation, G.HR., L.SH, L.LX., W.JB.; Writing - Original Draft, G.HR., Z.SG.; Writing - Review & Editing, Z.HR., L.LX., W.JB., L.Y.; Visualization, G.HR., L.YF., S.LM., J.CY., L.XY., Y.GC.; Funding Acquisition, W.Y., L.Y., W.JB., L.LX.; Resources, L.LX., W.JB., L.Y.; Supervision, L.LX., W.JB., L.Y..

Thank you very much for your time and consideration. Wish you have a nice day!

**Sincerely yours,**

**Lianxin Liu**



|      |                                                    |                    |
|------|----------------------------------------------------|--------------------|
| 主 题: | Re: The change of co-authors about CDDIS-21-4379RR |                    |
| 发件人: | jbwang16@ustc.edu.cn                               | 2022-6-27 15:24:50 |
| 收件人: | liulx@ustc.edu.cn                                  |                    |

**I accept all the author information changes.**

**Jiabei Wang**

-----原始邮件-----

**发件人:** liulx@ustc.edu.cn

**发送时间:** 2022-06-27 11:48:19 (星期一)

**收件人:** "郭泓瑞" <hongrui7456@163.com>, "梁书航" <154652031@qq.com>, wangyan2016md@126.com, zhouwill01@163.com, "尹大龙" <dalong48@163.com>, "张树庚" <shugeng517@163.com>, "王继洲" <wangjizhou1984@hotmail.com>, tianxiadiyi\_12345@126.com, 1694769800@qq.com, 413951217 <413951217@qq.com>, lemonzhutou@163.com, cyji@mail.ustc.edu.cn, lidonglps@qq.com, drzhr1026@hotmail.com, ygc1988@sina.com, 1006065333@qq.com, 1241346394 <1241346394@qq.com>, 1254007965@qq.com, "刘尧" <liuyao66@ustc.edu.cn>, jbwang16 <jbwang16@ustc.edu.cn>

**抄送:**

**主题:** The change of co-authors about CDDIS-21-4379RR

**Dear Authors:**

Our recent manuscript CDDIS-21-4379RR, entitled "Cytochrome B5 Type A alleviates HCC metastasis via regulating STOML2 related autophagy and promoting sensitivity to Ruxolitinib." has been provisionally accepted for publication in Cell Death & Disease, lists you as a co-author. The author information has changed since the original submission.

In particular, I added Jizhou Wang as a co-author in view of his important contribution to the revision process. And I adjusted the order considering the contributions of all authors.

**As the author information has changed, I ask for your opinion:**

If you **agree** with all the final author information, please reply **I accept all the author information changes.**

If you **disagree** with the final author information or have other suggestions, please email me with details.

The changes of Author List and Contributions are as follows:

**Final Author List:**

Hongrui Guo<sup>1\*</sup>, Shuhang Liang<sup>2\*</sup>, Yan Wang<sup>3\*</sup>, Shuo Zhou<sup>2\*</sup>, Dalong Yin<sup>2\*</sup>, Shugeng Zhang<sup>2</sup>, Jizhou Wang<sup>2</sup>, Dehai Wu<sup>1</sup>, Kun Ma<sup>1</sup>, Yufeng Liu<sup>1</sup>, Linmao Sun<sup>1</sup>, Changyong Ji<sup>2</sup>, Xianying Li<sup>2</sup>, Huanran Zhou<sup>2</sup>, Guangchao Yang<sup>1</sup>, Xinyu Guo<sup>1</sup>, Tianming Cui<sup>2</sup>, Zihao Li<sup>1</sup>, Yao Liu<sup>2+</sup>, Jiabei Wang<sup>2+</sup>, Lianxin Liu<sup>1,4+</sup>

**Final Author affiliations:**

1.Department of Hepatic Surgery, Key Laboratory of Hepatosplenic Surgery, Ministry of Education, The First Affiliated Hospital of Harbin Medical University, Harbin, China

2.Department of Hepatobiliary Surgery, Anhui Province Key Laboratory of Hepatopancreatobiliary Surgery, The First Affiliated Hospital of USTC, Division of Life Sciences and Medicine, University of Science and Technology of China, Hefei, Anhui, 230001, China

3.Department of Colorectal Surgery, Harbin Medical University Cancer Hospital, Harbin, 150001 Heilongjiang, China

4. Lead contact

\* These authors contributed equally to this work.

**Final Author contributions:**

Conceptualization, G.HR., L.SH., L.LX., W.JB., L.Y.; Methodology, Y.DL., W.DH., W.Y., Z.S., W.JZ., Z.SG., M.K., L.ZH.; Software, L.YF., S.LM., J.CY., L.XY., Y.GC.; Validation, G.HR., L.SH, Z.HR., L.ZH., G.XY., C.TM.; Formal Analysis, Z.S.,Y.DL.,L.LX., W.JB., L.Y.; Investigation, G.HR., L.SH, L.LX., W.JB.; Writing - Original Draft, G.HR., Z.SG.; Writing - Review & Editing, Z.HR., L.LX., W.JB., L.Y.; Visualization, G.HR., L.YF., S.LM., J.CY., L.XY., Y.GC.; Funding Acquisition, W.Y., L.Y., W.JB., L.LX.; Resources, L.LX., W.JB., L.Y.; Supervision, L.LX., W.JB., L.Y..

Thank you very much for your time and consideration. Wish you have a nice day!

**Sincerely yours,**

**Lianxin Liu**
